# Supplementary material for: MicroRNA, mRNA, and Proteomics Biomarkers and Therapeutic Targets for Improving Lung Cancer Treatment Outcomes
Source: Cancers (Basel). 2023 Apr 14;15(8):2294. doi: 10.3390/cancers15082294 (PMC10137184; doi:10.3390/cancers15082294)
Supplement: Supplementary file 1 [file cancers-15-02294-s001.zip]

Archive with 8 entries (8 files):
- S1. Overall flowchart.pdf
- S2. miRNA diagnostic markers.csv
- S3. prognostic miRNAs.xlsx
- S4. NCCN drugs pansensitive and panresistant genes fusion mutation details.xlsx
- S5. Genes associated with radiotherapy response.xlsx
- S6. Prognostic genes.csv
- S7. CMap results.xlsx
- S8. Drug response gene fusions and mutations in human NSCLC cell lines.xlsx
