# Supplementary material for: MicroRNA, mRNA, and Proteomics Biomarkers and Therapeutic Targets for Improving Lung Cancer Treatment Outcomes
Source: Cancers (Basel). 2023 Apr 14;15(8):2294. doi: 10.3390/cancers15082294 (PMC10137184; doi:10.3390/cancers15082294)
Supplement: Supplementary file 1 [file cancers-15-02294-s001.zip › S2. miRNA diagnostic markers.csv]

Source.Probe.me	Probe.ID.unpaired	Probe.ID.paired	foldchg.unpaired	foldchg.paired
hsa-miR-105		3166	1.990088989	2.136157447
hsa-miR-141_mmu-miR-141_rno-miR-141		2117	1.243121733	2.019242183
hsa-miR-3065-3p		ORB_0510239	0.515976931	0.47632259
hsa-miR-3065-5p		ORB_0510189	0.50041687	0.469766635
hsa-miR-3184		ORB_0510253	0.546567927	0.436420753
hsa-miR-608		3000	0.662788232	0.448211819
hsa-miR-933		3268	1.53005067	2.033745785
hsa-miR-101_mmu-miR-101a_rno-miR-101a	2562		0.400994235	0.555549608
hsa-miR-138_mmu-miR-138_rno-miR-138	1878		0.368292276	0.767376625
hsa-miR-145_mmu-miR-145_rno-miR-145	3111		0.456434259	0.567975497
hsa-miR-196a_mmu-miR-196a_rno-miR-196a	2165		2.235464024	1.956527765
hsa-miR-205_mmu-miR-205_rno-miR-205	1368		3.865908759	2.482398601
hsa-miR-218-1*	3033		0.497088976	0.550994687
hsa-miR-223_mmu-miR-223_rno-miR-223	3261		0.447378614	0.533608313
hsa-miR-223*	3070		0.468522876	0.607537568
hsa-miR-30c_mmu-miR-30c_rno-miR-30c	2281		0.485372052	0.518500202
hsa-miR-30e*_mmu-miR-30e*_rno-miR-30e*	3294		0.379642745	0.500322415
hsa-miR-335_mmu-miR-335-5p_rno-miR-335	3168		0.407098261	0.552539285
hsa-miR-34b*	ORB_1008009		0.394480568	0.447893358
hsa-miR-363_mmu-miR-363_rno-miR-363	1822		0.473613174	0.753683791
hsa-miR-411_mmu-miR-411_rno-miR-411	3148		2.57625364	1.851037886
hsa-miR-4328	ORB_0510266		0.460534225	0.536590313
hsa-miR-497	1995		0.408973894	0.507680694
hsa-miR-1_mmu-miR-1	2262	2262	0.20709714	0.310795061
hsa-miR-126_mmu-miR-126-3p_rno-miR-126	1380	1380	0.300020434	0.386142101
hsa-miR-126*_mmu-miR-126-5p_rno-miR-126*	1171	1171	0.267151056	0.336566605
hsa-miR-1260	IGN_orb_0408066	IGN_orb_0408066	2.26669289	2.191695716
hsa-miR-1260b	ORB_0510351	ORB_0510351	2.607922889	2.905950075
hsa-miR-1274a	IGN_orb_0408082	IGN_orb_0408082	2.335853371	2.812486782
hsa-miR-1280	IGN_orb_0408101_3	IGN_orb_0408101_3	2.699369953	2.876540931
hsa-miR-130b_mmu-miR-130b_rno-miR-130b	3009	3009	2.385414196	2.614665658
hsa-miR-133a_mmu-miR-133a_rno-miR-133a	2340	2340	0.277364485	0.350373322
hsa-miR-133b_mmu-miR-133b_rno-miR-133b	1498	1498	0.29033418	0.347285757
hsa-miR-139-5p_mmu-miR-139-5p_rno-miR-139-5p	3192	3192	0.280923246	0.311211913
hsa-miR-143_mmu-miR-143	3214	3214	0.468212804	0.484940698
hsa-miR-144_mmu-miR-144_rno-miR-144	2140	2140	0.177711071	0.25390568
hsa-miR-144*	3101	3101	0.37965121	0.428700737
hsa-miR-145*	3102	3102	0.341950858	0.438307278
hsa-miR-182	3296	3296	3.683071077	3.379825949
hsa-miR-183_mmu-miR-183_rno-miR-183	3157	3157	3.374989657	2.946785449
hsa-miR-183*_mmu-miR-183*	3208	3208	2.345442575	2.101676615
hsa-miR-193b	2915	2915	2.066725465	2.301582063
hsa-miR-195_mmu-miR-195_rno-miR-195	1311	1311	0.370843272	0.438045018
hsa-miR-21_mmu-miR-21_rno-miR-21	1315	1315	2.488050314	3.81653953
hsa-miR-21*	2904	2904	2.122953771	2.531086931
hsa-miR-210_mmu-miR-210_rno-miR-210	2291	2291	3.291317504	3.124949761
hsa-miR-218_mmu-miR-218_rno-miR-218	1143	1143	0.24496167	0.328714818
hsa-miR-23a*_rno-miR-23a*	ORB_1209055	ORB_1209055	0.45698219	0.356149173
hsa-miR-27a*_mmu-miR-27a*_rno-miR-27a*	2996	2996	0.420430949	0.39551375
hsa-miR-301b	3055	3055	2.718057152	2.365321172
hsa-miR-30a_mmu-miR-30a_rno-miR-30a	3257	3257	0.193576436	0.230286811
hsa-miR-30a*_mmu-miR-30a*_rno-miR-30a*	3295	3295	0.167595524	0.195532845
hsa-miR-30b_mmu-miR-30b_rno-miR-30b-5p	2280	2280	0.400412295	0.453866068
hsa-miR-30c-2*_mmu-miR-30c-2*_rno-miR-30c-2*	3245	3245	0.383748291	0.365241904
hsa-miR-30d_mmu-miR-30d_rno-miR-30d	1251	1251	0.358874526	0.381921247
hsa-miR-31_mmu-miR-31_rno-miR-31	1092	1092	6.22627977	10.370857
hsa-miR-31*	3237	3237	2.892395024	4.027404809
hsa-miR-338-3p_mmu-miR-338-3p	2197	2197	0.270964032	0.364165872
hsa-miR-338-5p_mmu-miR-338-5p_rno-miR-338*	2902	2902	0.451329624	0.457138562
hsa-miR-34b	2932	2932	0.44942946	0.360774068
hsa-miR-34c-3p	2931	2931	0.495195446	0.379482975
hsa-miR-34c-5p_mmu-miR-34c_rno-miR-34c	2990	2990	0.309788852	0.330095567
hsa-miR-4284	ORB_0510097	ORB_0510097	2.041285268	2.040835279
hsa-miR-451_mmu-miR-451_rno-miR-451	1755	1755	0.222377411	0.362963775
hsa-miR-486-5p_mmu-miR-486	2209	2209	0.180986264	0.209625092
hsa-miR-494_mmu-miR-494_rno-miR-494	2230	2230	2.084586551	2.045308357
hsa-miR-7_mmu-miR-7a_rno-miR-7a	3239	3239	2.201048337	2.25521908
hsa-miR-708_mmu-miR-708_rno-miR-708	2923	2923	2.925524844	2.654213411
hsa-miR-720	IGN_orb_0408109_3	IGN_orb_0408109_3	2.594755261	3.592049353
hsa-miR-9_mmu-miR-9_rno-miR-9	3204	3204	2.708592383	2.768867425
hsa-miR-9*_mmu-miR-9*_rno-miR-9*	3019	3019	4.070753726	3.540170274
hsa-miR-96_mmu-miR-96_rno-miR-96	3297	3297	3.717561684	3.917311062
hsa-miR-99a_mmu-miR-99a_rno-miR-99a	1068	1068	0.437701484	0.452995406
