# Supplementary material for: MicroRNA, mRNA, and Proteomics Biomarkers and Therapeutic Targets for Improving Lung Cancer Treatment Outcomes
Source: Cancers (Basel). 2023 Apr 14;15(8):2294. doi: 10.3390/cancers15082294 (PMC10137184; doi:10.3390/cancers15082294)
Supplement: Supplementary file 1 [file cancers-15-02294-s001.zip › S3. prognostic miRNAs.xlsx]

## Sheet: Sheet1
miRNAs with a hazard ratio > 1 and a p-value < 0.05 in survival analysis were potential oncogenic, and those with a hazard ratio < 1 and a p-value < 0.05 in survival analysis were potential tumor suppressive.
	miRNA	TCGA NSCLC miRNA isoform expression for tumor samples (Normalized, RPM)	TCGA NSCLC miRNA expression for tumor samples (Illumina HiSeq platform, miRgene-level, Normalized, RPM)	TCGA LUAD miRNA isoform expression for tumor samples (Normalized, RPM)	TCGA LUAD miRNA expression for tumor samples (Illumina HiSeq platform, miRgene-level, Normalized, RPM)	TCGA LUSC miRNA isoform expression for tumor samples (Normalized, RPM)	TCGA LUSC miRNA expression for tumor samples (Illumina HiSeq platform, miRgene-level, Normalized, RPM)
	hsa-miR-130b	Potential tumor suppressive	NS	NS	NS	Potential tumor suppressive	NS
	hsa-miR-144	Potential tumor suppressive	NS	Potential tumor suppressive	NS	Potential tumor suppressive	Potential tumor suppressive
	hsa-miR-182	NS	Potential tumor suppressive	NS	NS	NS	Potential tumor suppressive
	hsa-miR-183	NS	Potential tumor suppressive	NS	NS	Potential tumor suppressive	Potential tumor suppressive
	hsa-miR-193b	Potential oncogenic	NS	Potential oncogenic	NS	NS	Potential oncogenic
	hsa-miR-195	NS	Potential tumor suppressive	NS	Potential tumor suppressive	NS	Potential tumor suppressive
	hsa-miR-21	NS	Potential oncogenic	NS	Potential oncogenic	NS	Potential oncogenic
	hsa-miR-223	Potential tumor suppressive	NS	NS	NS	NS	NS
	hsa-miR-30a	NS	Potential tumor suppressive	NS	Potential tumor suppressive	NS	NS
	hsa-miR-30b	Potential tumor suppressive	Potential tumor suppressive	NS	Potential tumor suppressive	Potential tumor suppressive	NS
	hsa-miR-30d	NS	Potential tumor suppressive	NS	Potential tumor suppressive	NS	NS
	hsa-miR-31	NS	Potential oncogenic	NS	Potential oncogenic	NS	NS
	hsa-miR-335	NS	NS	Potential tumor suppressive	NS	NS	NS
	hsa-miR-363	NS	Potential tumor suppressive	NS	NS	Potential tumor suppressive	Potential tumor suppressive
	hsa-miR-411	NS	NS	NS	Potential oncogenic	NS	NS
	hsa-miR-451	Potential tumor suppressive	NS	NS	NS	Potential tumor suppressive	Potential tumor suppressive
	hsa-miR-494	NS	NS	Potential oncogenic	NS	NS	NS
	hsa-miR-708	Potential tumor suppressive	Potential tumor suppressive	NS	Potential tumor suppressive	Potential tumor suppressive	Potential tumor suppressive
	hsa-miR-96	NS	Potential tumor suppressive	NS	NS	NS	NS
	hsa-miR-99a	NS	Potential tumor suppressive	NS	Potential tumor suppressive	NS	NS
