# Supplementary material for: MicroRNA, mRNA, and Proteomics Biomarkers and Therapeutic Targets for Improving Lung Cancer Treatment Outcomes
Source: Cancers (Basel). 2023 Apr 14;15(8):2294. doi: 10.3390/cancers15082294 (PMC10137184; doi:10.3390/cancers15082294)
Supplement: Supplementary file 1 [file cancers-15-02294-s001.zip › S4. NCCN drugs pansensitive and panresistant genes fusion mutation details.xlsx]

## Sheet: mutation
Gene	drugName	geneCategory	DepMap_ID	Gene_mutation_in_cell_line	Entrez_Gene_Id	NCBI_Build	Chromosome	Start_position	End_position	Strand	Variant_Classification	Variant_Type	Reference_Allele	Alternate_Allele
ADH7	afatinib	Sensitive	ACH-001362	NCIH1770	131	37	4	100341921	100341921	+	Missense_Mutation	SNP	A	C
ADH7	afatinib	Sensitive	ACH-000841	NCIH2087	131	37	4	100349034	100349034	+	Nonsense_Mutation	SNP	C	A
ADH7	afatinib	Sensitive	ACH-000843	HARA	131	37	4	100349678	100349678	+	Missense_Mutation	SNP	A	T
CCNT1	alectinib	Resistant	ACH-000528	ABC1	904	37	12	49110406	49110406	+	Missense_Mutation	SNP	T	A
CCNT1	alectinib	Resistant	ACH-000980	NCIH1155	904	37	12	49110427	49110427	+	Missense_Mutation	SNP	C	T
CCNT1	alectinib	Resistant	ACH-000757	A427	904	37	12	49110602	49110602	+	De_novo_Start_OutOfFrame	SNP	G	A
CCNT1	alectinib	Resistant	ACH-000841	NCIH2087	904	37	12	49087117	49087117	+	Missense_Mutation	SNP	T	A
CCNT1	afatinib	Resistant	ACH-000528	ABC1	904	37	12	49110406	49110406	+	Missense_Mutation	SNP	T	A
CCNT1	afatinib	Resistant	ACH-000980	NCIH1155	904	37	12	49110427	49110427	+	Missense_Mutation	SNP	C	T
CCNT1	afatinib	Resistant	ACH-000757	A427	904	37	12	49110602	49110602	+	De_novo_Start_OutOfFrame	SNP	G	A
CCNT1	afatinib	Resistant	ACH-000841	NCIH2087	904	37	12	49087117	49087117	+	Missense_Mutation	SNP	T	A
CDC42	trametinib	Resistant	ACH-000562	HCC78	998	37	1	22413313	22413313	+	Missense_Mutation	SNP	G	T
CDC42	vinorelbine	Resistant	ACH-000562	HCC78	998	37	1	22413313	22413313	+	Missense_Mutation	SNP	G	T
CDK1	cisplatin	Resistant	ACH-000447	NCIH2228	983	37	10	62551687	62551687	+	Missense_Mutation	SNP	G	A
CDK1	cisplatin	Resistant	ACH-000012	HCC827	983	37	10	62547988	62547989	+	Splice_Site	INS	-	TTA
CDK1	gemcitabine	Resistant	ACH-000447	NCIH2228	983	37	10	62551687	62551687	+	Missense_Mutation	SNP	G	A
CDK1	gemcitabine	Resistant	ACH-000012	HCC827	983	37	10	62547988	62547989	+	Splice_Site	INS	-	TTA
CDK16	pemetrexed	Resistant	ACH-000975	HCC2450	5127	37	X	47083056	47083056	+	Missense_Mutation	SNP	G	C
CDK16	gemcitabine	Resistant	ACH-000975	HCC2450	5127	37	X	47083056	47083056	+	Missense_Mutation	SNP	G	C
CLCN5	dabrafenib	Resistant	ACH-000893	NCIH1651	1184	37	X	49840603	49840603	+	Missense_Mutation	SNP	A	T
CLCN5	dabrafenib	Resistant	ACH-000886	NCIH2009	1184	37	X	49855167	49855173	+	Splice_Site	DEL	AATTGGT	-
CLCN5	dabrafenib	Resistant	ACH-001137	NCIH1993	1184	37	X	49855039	49855039	+	Missense_Mutation	SNP	G	A
CLCN5	dabrafenib	Resistant	ACH-000852	NCIH1435	1184	37	X	49854970	49854970	+	Missense_Mutation	SNP	C	T
CLCN5	dabrafenib	Resistant	ACH-000980	NCIH1155	1184	37	X	49855132	49855132	+	Missense_Mutation	SNP	G	A
COPG1	docetaxel	Resistant	ACH-000451	NCIH2085	22820	37	3	128971157	128971157	+	Missense_Mutation	SNP	C	T
COPG1	docetaxel	Resistant	ACH-000860	NCIH358	22820	37	3	128994115	128994115	+	Missense_Mutation	SNP	C	G
COPG1	docetaxel	Resistant	ACH-000774	RERFLCAD2	22820	37	3	128987398	128987398	+	Missense_Mutation	SNP	C	T
COPG1	docetaxel	Resistant	ACH-000813	T3M10	22820	37	3	128971130	128971130	+	Missense_Mutation	SNP	G	A
DGKE	erlotinib	Sensitive	ACH-000975	HCC2450	8526	37	17	54912469	54912469	+	Missense_Mutation	SNP	C	A
DGKE	erlotinib	Sensitive	ACH-000553	SQ1	8526	37	17	54926162	54926162	+	Missense_Mutation	SNP	G	T
DGKE	erlotinib	Sensitive	ACH-000482	RERFLCKJ	8526	37	17	54912184	54912184	+	Missense_Mutation	SNP	G	A
DGKE	erlotinib	Sensitive	ACH-000563	EBC1	8526	37	17	54926166	54926166	+	Missense_Mutation	SNP	C	T
FBXL4	dacomitinib	Resistant	ACH-000603	BEN	26235	37	6	99353418	99353418	+	Nonsense_Mutation	SNP	C	T
FOS	vinorelbine	Resistant	ACH-000900	NCIH23	2353	37	14	75748075	75748075	+	Missense_Mutation	SNP	G	T
FOS	trametinib	Resistant	ACH-000900	NCIH23	2353	37	14	75748075	75748075	+	Missense_Mutation	SNP	G	T
GLI2	dabrafenib	Resistant	ACH-000945	NCIH650	2736	37	2	121747721	121747721	+	Missense_Mutation	SNP	G	C
GLI2	dabrafenib	Resistant	ACH-000916	NCIH1573	2736	37	2	121747349	121747349	+	Missense_Mutation	SNP	G	A
GLI2	dabrafenib	Resistant	ACH-000951	NCIH2342	2736	37	2	121746737	121746737	+	Missense_Mutation	SNP	G	T
GLI2	dabrafenib	Resistant	ACH-000945	NCIH650	2736	37	2	121747661	121747661	+	Missense_Mutation	SNP	C	A
GLI2	dabrafenib	Resistant	ACH-000395	NCIH520	2736	37	2	121747624	121747624	+	Missense_Mutation	SNP	C	A
GLI2	dabrafenib	Resistant	ACH-000888	NCIH1793	2736	37	2	121748207	121748207	+	Missense_Mutation	SNP	A	C
GLI2	dabrafenib	Resistant	ACH-000901	HCC1359	2736	37	2	121736096	121736096	+	Missense_Mutation	SNP	G	T
GLI2	dabrafenib	Resistant	ACH-000975	HCC2450	2736	37	2	121745905	121745905	+	Frame_Shift_Del	DEL	C	-
GLI2	dabrafenib	Resistant	ACH-000875	NCIH2347	2736	37	2	121712886	121712886	+	Missense_Mutation	SNP	G	C
GLI2	dabrafenib	Resistant	ACH-000893	NCIH1651	2736	37	2	121746219	121746219	+	Missense_Mutation	SNP	G	T
GLI2	dabrafenib	Resistant	ACH-000662	CORL23	2736	37	2	121726296	121726296	+	Missense_Mutation	SNP	G	A
GLI2	dabrafenib	Resistant	ACH-000416	NCIH838	2736	37	2	121712903	121712903	+	Missense_Mutation	SNP	G	T
GLI2	dabrafenib	Resistant	ACH-000951	NCIH2342	2736	37	2	121729593	121729593	+	Missense_Mutation	SNP	C	A
GLI2	dabrafenib	Resistant	ACH-000343	NCIH522	2736	37	2	121740386	121740386	+	Missense_Mutation	SNP	A	G
GLI2	dabrafenib	Resistant	ACH-000892	NCIH1563	2736	37	2	121726340	121726340	+	Missense_Mutation	SNP	G	C
GLI2	dabrafenib	Resistant	ACH-000789	NCIH810	2736	37	2	121747898	121747898	+	Missense_Mutation	SNP	C	T
GLI2	dabrafenib	Resistant	ACH-000712	HCC1833	2736	37	2	121747167	121747167	+	Missense_Mutation	SNP	G	T
GLI2	dabrafenib	Resistant	ACH-000781	NCIH2023	2736	37	2	121712959	121712959	+	Missense_Mutation	SNP	G	T
GLI2	dabrafenib	Resistant	ACH-000379	NCIH1781	2736	37	2	121746932	121746932	+	Nonsense_Mutation	SNP	G	T
GLI2	dabrafenib	Resistant	ACH-000826	CAL12T	2736	37	2	121747403	121747403	+	Missense_Mutation	SNP	C	A
GLI2	dabrafenib	Resistant	ACH-000925	DV90	2736	37	2	121726418	121726418	+	Missense_Mutation	SNP	G	A
GLTP	erlotinib	Resistant	ACH-000843	HARA	51228	37	12	110296522	110296522	+	Missense_Mutation	SNP	G	A
GLTP	docetaxel	Resistant	ACH-000843	HARA	51228	37	12	110296522	110296522	+	Missense_Mutation	SNP	G	A
GLTP	vinorelbine	Resistant	ACH-000843	HARA	51228	37	12	110296522	110296522	+	Missense_Mutation	SNP	G	A
GLTP	dacomitinib	Resistant	ACH-000843	HARA	51228	37	12	110296522	110296522	+	Missense_Mutation	SNP	G	A
NCEH1	docetaxel	Resistant	ACH-000700	NCIH2882	57552	37	3	172365757	172365757	+	Missense_Mutation	SNP	C	G
NCEH1	docetaxel	Resistant	ACH-000463	NCIH460	57552	37	3	172353867	172353867	+	Missense_Mutation	SNP	C	T
NCEH1	docetaxel	Resistant	ACH-000893	NCIH1651	57552	37	3	172353708	172353708	+	Nonsense_Mutation	SNP	G	A
NCEH1	docetaxel	Resistant	ACH-002337	JHU028	57552	37	3	172351628	172351628	+	Nonsense_Mutation	SNP	C	T
NCEH1	vinorelbine	Resistant	ACH-000700	NCIH2882	57552	37	3	172365757	172365757	+	Missense_Mutation	SNP	C	G
NCEH1	vinorelbine	Resistant	ACH-000463	NCIH460	57552	37	3	172353867	172353867	+	Missense_Mutation	SNP	C	T
NCEH1	vinorelbine	Resistant	ACH-000893	NCIH1651	57552	37	3	172353708	172353708	+	Nonsense_Mutation	SNP	G	A
NCEH1	vinorelbine	Resistant	ACH-002337	JHU028	57552	37	3	172351628	172351628	+	Nonsense_Mutation	SNP	C	T
NISCH	trametinib	Resistant	ACH-001362	NCIH1770	11188	37	3	52521556	52521556	+	Missense_Mutation	SNP	C	T
NISCH	trametinib	Resistant	ACH-000858	KNS62	11188	37	3	52525978	52525978	+	Missense_Mutation	SNP	T	C
NISCH	trametinib	Resistant	ACH-000339	HCC461	11188	37	3	52521741	52521741	+	Nonsense_Mutation	SNP	G	T
NISCH	trametinib	Resistant	ACH-000414	NCIH1944	11188	37	3	52521536	52521536	+	Missense_Mutation	SNP	G	T
NISCH	trametinib	Resistant	ACH-000826	CAL12T	11188	37	3	52514272	52514272	+	Missense_Mutation	SNP	G	T
NISCH	trametinib	Resistant	ACH-000414	NCIH1944	11188	37	3	52526081	52526081	+	Frame_Shift_Del	DEL	C	-
NISCH	trametinib	Resistant	ACH-000904	NCIH2106	11188	37	3	52521556	52521556	+	Missense_Mutation	SNP	C	T
NISCH	trametinib	Resistant	ACH-000861	HOP62	11188	37	3	52507823	52507823	+	Missense_Mutation	SNP	G	T
NISCH	trametinib	Resistant	ACH-000712	HCC1833	11188	37	3	52521733	52521733	+	Missense_Mutation	SNP	C	T
NISCH	trametinib	Resistant	ACH-000888	NCIH1793	11188	37	3	52523534	52523534	+	Missense_Mutation	SNP	C	T
NISCH	trametinib	Resistant	ACH-000731	HCC2279	11188	37	3	52522608	52522608	+	Missense_Mutation	SNP	G	A
PCBP1	trametinib	Resistant	ACH-000980	NCIH1155	5093	37	2	70315363	70315363	+	Missense_Mutation	SNP	G	A
RAB30	vinorelbine	Resistant	ACH-000706	EKVX	27314	37	11	82693376	82693376	+	Missense_Mutation	SNP	T	A
RAB30	vinorelbine	Resistant	ACH-000779	PC9	27314	37	11	82698654	82698654	+	Missense_Mutation	SNP	G	T
RAB30	docetaxel	Resistant	ACH-000706	EKVX	27314	37	11	82693376	82693376	+	Missense_Mutation	SNP	T	A
RAB30	docetaxel	Resistant	ACH-000779	PC9	27314	37	11	82698654	82698654	+	Missense_Mutation	SNP	G	T
RAB30	paclitaxel	Resistant	ACH-000706	EKVX	27314	37	11	82693376	82693376	+	Missense_Mutation	SNP	T	A
RAB30	paclitaxel	Resistant	ACH-000779	PC9	27314	37	11	82698654	82698654	+	Missense_Mutation	SNP	G	T
TAOK2	trametinib	Resistant	ACH-000066	HCC4006	9344	37	16	29994457	29994457	+	Missense_Mutation	SNP	C	T
TAOK2	trametinib	Resistant	ACH-000893	NCIH1651	9344	37	16	29994421	29994421	+	Missense_Mutation	SNP	G	A
TAOK2	trametinib	Resistant	ACH-000826	CAL12T	9344	37	16	29994855	29994856	+	Frame_Shift_Del	DEL	AG	-
TAOK2	trametinib	Resistant	ACH-000510	NCIH1299	9344	37	16	29999264	29999264	+	Missense_Mutation	SNP	G	T
TAOK2	trametinib	Resistant	ACH-000893	NCIH1651	9344	37	16	29998309	29998309	+	Missense_Mutation	SNP	G	C
TAOK2	trametinib	Resistant	ACH-000980	NCIH1155	9344	37	16	29998064	29998064	+	Missense_Mutation	SNP	C	A
TAOK2	trametinib	Resistant	ACH-002101	EMCBAC1	9344	37	16	29996738	29996738	+	Missense_Mutation	SNP	G	T
TAOK2	trametinib	Resistant	ACH-000924	NCIH2172	9344	37	16	29989075	29989075	+	De_novo_Start_OutOfFrame	SNP	A	T
TAOK2	trametinib	Resistant	ACH-000945	NCIH650	9344	37	16	29998394	29998394	+	Missense_Mutation	SNP	A	T
TAOK2	trametinib	Resistant	ACH-000666	NCIH1355	9344	37	16	29996568	29996568	+	Missense_Mutation	SNP	C	T
TAOK2	trametinib	Resistant	ACH-000826	CAL12T	9344	37	16	29998733	29998733	+	Missense_Mutation	SNP	C	T
TAOK2	trametinib	Resistant	ACH-000781	NCIH2023	9344	37	16	29998085	29998085	+	Missense_Mutation	SNP	A	G
TAOK2	trametinib	Resistant	ACH-000945	NCIH650	9344	37	16	29989416	29989416	+	Missense_Mutation	SNP	G	T
TRIB1	afatinib	Resistant	ACH-000710	NCIH854	10221	37	8	126443199	126443199	+	Missense_Mutation	SNP	C	T
WDR47	osimertinib	Resistant	ACH-000853	NCIH661	22911	37	1	109514159	109514159	+	Missense_Mutation	SNP	C	G
WDR47	osimertinib	Resistant	ACH-000951	NCIH2342	22911	37	1	109526047	109526047	+	Missense_Mutation	SNP	A	T
WDR47	osimertinib	Resistant	ACH-000894	NCIH1869	22911	37	1	109517347	109517347	+	Missense_Mutation	SNP	G	A
WDR47	osimertinib	Resistant	ACH-000826	CAL12T	22911	37	1	109517272	109517272	+	Missense_Mutation	SNP	C	A
WDR47	osimertinib	Resistant	ACH-000339	HCC461	22911	37	1	109560148	109560148	+	Missense_Mutation	SNP	G	T
WDR47	afatinib	Resistant	ACH-000853	NCIH661	22911	37	1	109514159	109514159	+	Missense_Mutation	SNP	C	G
WDR47	afatinib	Resistant	ACH-000951	NCIH2342	22911	37	1	109526047	109526047	+	Missense_Mutation	SNP	A	T
WDR47	afatinib	Resistant	ACH-000894	NCIH1869	22911	37	1	109517347	109517347	+	Missense_Mutation	SNP	G	A
WDR47	afatinib	Resistant	ACH-000826	CAL12T	22911	37	1	109517272	109517272	+	Missense_Mutation	SNP	C	A
WDR47	afatinib	Resistant	ACH-000339	HCC461	22911	37	1	109560148	109560148	+	Missense_Mutation	SNP	G	T
WDR47	brigatinib	Resistant	ACH-000853	NCIH661	22911	37	1	109514159	109514159	+	Missense_Mutation	SNP	C	G
WDR47	brigatinib	Resistant	ACH-000951	NCIH2342	22911	37	1	109526047	109526047	+	Missense_Mutation	SNP	A	T
WDR47	brigatinib	Resistant	ACH-000894	NCIH1869	22911	37	1	109517347	109517347	+	Missense_Mutation	SNP	G	A
WDR47	brigatinib	Resistant	ACH-000826	CAL12T	22911	37	1	109517272	109517272	+	Missense_Mutation	SNP	C	A
WDR47	brigatinib	Resistant	ACH-000339	HCC461	22911	37	1	109560148	109560148	+	Missense_Mutation	SNP	G	T

## Sheet: fusion
Gene	drugName	geneCategory	DepMap_ID	cell_line_name	stripped_cell_line_name	FusionName	JunctionReadCount	SpanningFragCount	SpliceType	LeftGene	LeftBreakpoint	RightGene	RightBreakpoint	LargeAnchorSupport	FFPM	LeftBreakDinuc	LeftBreakEntropy	RightBreakDinuc	RightBreakEntropy	annots	CCLE_count
NCEH1	docetaxel	Resistant	ACH-000681	A549	A549	NCEH1--MUC13	2	11	ONLY_REF_SPLICE	NCEH1 (ENSG00000144959.9)	chr3:172710847:-	MUC13 (ENSG00000173702.7)	chr3:124927993:-	YES_LDAS	0.141	GT	1.8892	AG	1.4295	[\CCLE_StarF2019\,\INTRACHROMOSOMAL[chr3:47.68Mb]\]	1
NCEH1	docetaxel	Resistant	ACH-000681	A549	A549	NCEH1--MUC13	1	11	ONLY_REF_SPLICE	NCEH1 (ENSG00000144959.9)	chr3:172710847:-	MUC13 (ENSG00000173702.7)	chr3:124939520:-	YES_LDAS	0.1301	GT	1.8892	AG	1.9086	[\CCLE_StarF2019\,\INTRACHROMOSOMAL[chr3:47.68Mb]\]	1
NCEH1	docetaxel	Resistant	ACH-000681	A549	A549	NCEH1--MUC13	2	11	ONLY_REF_SPLICE	NCEH1 (ENSG00000144959.9)	chr3:172710847:-	MUC13 (ENSG00000173702.7)	chr3:124938332:-	YES_LDAS	0.141	GT	1.8892	AG	1.5329	[\CCLE_StarF2019\,\INTRACHROMOSOMAL[chr3:47.68Mb]\]	1
NCEH1	vinorelbine	Resistant	ACH-000681	A549	A549	NCEH1--MUC13	2	11	ONLY_REF_SPLICE	NCEH1 (ENSG00000144959.9)	chr3:172710847:-	MUC13 (ENSG00000173702.7)	chr3:124927993:-	YES_LDAS	0.141	GT	1.8892	AG	1.4295	[\CCLE_StarF2019\,\INTRACHROMOSOMAL[chr3:47.68Mb]\]	1
NCEH1	vinorelbine	Resistant	ACH-000681	A549	A549	NCEH1--MUC13	1	11	ONLY_REF_SPLICE	NCEH1 (ENSG00000144959.9)	chr3:172710847:-	MUC13 (ENSG00000173702.7)	chr3:124939520:-	YES_LDAS	0.1301	GT	1.8892	AG	1.9086	[\CCLE_StarF2019\,\INTRACHROMOSOMAL[chr3:47.68Mb]\]	1
NCEH1	vinorelbine	Resistant	ACH-000681	A549	A549	NCEH1--MUC13	2	11	ONLY_REF_SPLICE	NCEH1 (ENSG00000144959.9)	chr3:172710847:-	MUC13 (ENSG00000173702.7)	chr3:124938332:-	YES_LDAS	0.141	GT	1.8892	AG	1.5329	[\CCLE_StarF2019\,\INTRACHROMOSOMAL[chr3:47.68Mb]\]	1
NISCH	trametinib	Resistant	ACH-000706	EKVX	EKVX	NISCH--S100A6	3	2	INCL_NON_REF_SPLICE	NISCH (ENSG00000010322.15)	chr3:52489591:+	S100A6 (ENSG00000197956.9)	chr1:153535982:-	YES_LDAS	0.0579	CA	1.8892	CG	1.7968	[\INTERCHROMOSOMAL[chr3--chr1]\]	1
TAOK2	trametinib	Resistant	ACH-000712	HCC-1833	HCC1833	TAOK2--ABCA4	94	48	ONLY_REF_SPLICE	TAOK2 (ENSG00000149930.17)	chr16:29974648:+	ABCA4 (ENSG00000198691.12)	chr1:94011385:-	YES_LDAS	1.628	GT	1.8892	AG	1.9329	[\CCLE_StarF2019\,\INTERCHROMOSOMAL[chr16--chr1]\]	1
