# Supplementary material for: MicroRNA, mRNA, and Proteomics Biomarkers and Therapeutic Targets for Improving Lung Cancer Treatment Outcomes
Source: Cancers (Basel). 2023 Apr 14;15(8):2294. doi: 10.3390/cancers15082294 (PMC10137184; doi:10.3390/cancers15082294)
Supplement: Supplementary file 1 [file cancers-15-02294-s001.zip › S5. Genes associated with radiotherapy response.xlsx]

## Sheet: mRNA_sigs
gene	p.value	mean_short	mean_long	FC_SvsL	RadioCate
MYC	7.62e-05	10.7036	12.3019	1.149	Sensitive
WDR47	0.0003821	8.08802	9.07612	1.122	Sensitive
VPS4B	0.000576292	10.0814	10.7527	1.067	Sensitive
KLHL20	0.000595215	8.50112	9.0168	1.061	Sensitive
POLR2B	0.000948284	10.959	11.5063	1.05	Sensitive
MAPK14	0.00106487	10.5314	11.0331	1.048	Sensitive
POLD2	0.00119032	11.153	11.7158	1.05	Sensitive
HIST1H2BG	0.00206721	3.49504	5.6541	1.618	Sensitive
AMMECR1	0.00207984	8.89795	10.0192	1.126	Sensitive
PHLPP1	0.00216157	8.71034	9.522	1.093	Sensitive
C1orf52	0.00327515	8.19463	8.70596	1.062	Sensitive
TMEM154	0.00426951	7.49335	9.17054	1.224	Sensitive
PSMD10	0.00532129	10.0097	10.6259	1.062	Sensitive
FIGNL1	0.00541668	8.66496	9.36102	1.08	Sensitive
HOXA10	0.00570203	5.81712	7.82014	1.344	Sensitive
CAMK2D	0.00591293	9.67375	10.4862	1.084	Sensitive
FRMD6	0.00606231	9.23328	11.4411	1.239	Sensitive
DDX21	0.00622184	11.2137	11.9127	1.062	Sensitive
FSCN1	0.00648553	11.773	13.3929	1.138	Sensitive
SLC2A1	0.00687912	12.6181	14.4928	1.149	Sensitive
TMLHE	0.00712629	7.02454	7.60246	1.082	Sensitive
SLAIN2	0.00772379	10.0552	10.7046	1.065	Sensitive
ASB7	0.00775368	8.36316	9.18406	1.098	Sensitive
TBRG4	0.00821133	10.6495	11.1381	1.046	Sensitive
FIP1L1	0.00879394	9.51712	10.0021	1.051	Sensitive
FEM1B	0.010362	10.4306	11.12	1.066	Sensitive
METAP1	0.0104634	10.3435	11.4542	1.107	Sensitive
PTPN14	0.011189	7.64309	8.58136	1.123	Sensitive
FAM83D	0.0111933	9.28922	10.2195	1.1	Sensitive
ARPC2	0.0112312	12.4726	13.02	1.044	Sensitive
GPNMB	0.0120052	12.5891	14.3293	1.138	Sensitive
PURB	0.0127397	10.7304	11.0909	1.034	Sensitive
C1orf226	0.0144629	8.44014	9.14086	1.083	Sensitive
GJA1	0.0148339	11.2944	12.4753	1.105	Sensitive
PRR11	0.015046	7.0997	8.04072	1.133	Sensitive
YRDC	0.0152725	8.8402	9.26768	1.048	Sensitive
DKC1	0.0160524	10.9199	11.4525	1.049	Sensitive
CNTN1	0.0165151	5.38905	8.73928	1.622	Sensitive
STK25	0.0168222	10.985	11.3914	1.037	Sensitive
EMP1	0.0168568	11.0387	11.8812	1.076	Sensitive
WDR43	0.0172163	10.3202	10.7714	1.044	Sensitive
UBE2D3	0.0178279	12.0634	12.4296	1.03	Sensitive
DNAJB14	0.0184147	8.15828	8.76064	1.074	Sensitive
STAMBP	0.0189301	9.76572	10.0906	1.033	Sensitive
RPS6KA5	0.0189655	6.72142	7.62202	1.134	Sensitive
C1orf109	0.0191048	8.31542	8.82528	1.061	Sensitive
SMAD3	0.0194905	10.3608	11.1993	1.081	Sensitive
COIL	0.0197873	9.13781	9.55782	1.046	Sensitive
RAP2C	0.0205911	9.62387	10.0787	1.047	Sensitive
LARS2	0.0209993	8.85687	9.30056	1.05	Sensitive
SLC39A6	0.0212863	10.9755	11.6598	1.062	Sensitive
CENPI	0.0225779	6.13322	6.86272	1.119	Sensitive
CDCP1	0.0227708	10.7169	11.6843	1.09	Sensitive
GRSF1	0.0235708	10.9695	11.362	1.036	Sensitive
MREG	0.0237125	9.04338	9.72758	1.076	Sensitive
NXN	0.0240333	9.69555	10.8435	1.118	Sensitive
FZD6	0.0252509	10.236	11.4835	1.122	Sensitive
LDLR	0.0263543	10.7247	11.718	1.093	Sensitive
CSRNP3	0.0265801	2.39454	3.78354	1.58	Sensitive
PHTF2	0.0272391	9.4522	10.0306	1.061	Sensitive
FAM76A	0.0281374	7.47689	7.8244	1.046	Sensitive
PGK1	0.0287992	13.5052	14.1415	1.047	Sensitive
NDRG1	0.0288205	13.4925	15.2871	1.133	Sensitive
USP31	0.028896	9.06967	9.93166	1.095	Sensitive
ZNF460	0.0289153	5.61088	6.7877	1.21	Sensitive
TBCK	0.0309278	8.25996	8.66108	1.049	Sensitive
UBE3A	0.0311376	10.46	10.9233	1.044	Sensitive
HAPLN3	0.0327769	8.10726	8.99104	1.109	Sensitive
MED28	0.0332394	8.94661	9.52302	1.064	Sensitive
DGKE	0.0334581	7.23911	8.02324	1.108	Sensitive
ZKSCAN5	0.0339037	8.46848	8.83108	1.043	Sensitive
CHM	0.0340452	8.61879	9.26026	1.074	Sensitive
TM2D1	0.0348151	8.44534	8.76674	1.038	Sensitive
PALLD	0.034879	11.5589	12.4302	1.075	Sensitive
GTF3C3	0.035918	9.54324	10.0825	1.057	Sensitive
MBP	0.0365338	9.62491	10.2658	1.067	Sensitive
FAM126A	0.0379009	9.45435	10.3767	1.098	Sensitive
TMPPE	0.03806	5.7115	6.51334	1.14	Sensitive
PELI1	0.0381024	10.0203	10.8022	1.078	Sensitive
PAICS	0.0386702	11.5633	11.9409	1.033	Sensitive
CDC25A	0.039958	7.50509	8.17008	1.089	Sensitive
DR1	0.0402941	10.1761	10.8585	1.067	Sensitive
USP8	0.0403561	9.80874	10.2336	1.043	Sensitive
ARRDC4	0.0403586	8.14512	9.36614	1.15	Sensitive
ANLN	0.0406568	10.5136	11.1046	1.056	Sensitive
CPNE3	0.0406812	11.3428	11.9759	1.056	Sensitive
SGK3	0.0410415	8.33468	8.9372	1.072	Sensitive
XPO5	0.0412652	10.5934	11.022	1.04	Sensitive
LYRM7	0.0416996	7.96271	8.28784	1.041	Sensitive
ARMCX5	0.0443817	8.09799	8.47124	1.046	Sensitive
WDR82	0.0451093	11.2724	11.6805	1.036	Sensitive
CHSY1	0.0453055	9.85933	10.5616	1.071	Sensitive
ATP6V1A	0.0468096	10.908	11.2988	1.036	Sensitive
HIF1A	0.0471446	12.2038	12.5812	1.031	Sensitive
NIPSNAP1	0.0484241	10.5974	11.2869	1.065	Sensitive
TRERF1	0.0493025	8.31582	9.35382	1.125	Sensitive
RRAGC	0.0495961	8.06336	8.47908	1.052	Sensitive
CDX2	1.3e-05	4.02241	0.17034	0.042	Resistant
HCN4	0.000132323	2.74959	0.4913	0.179	Resistant
HS6ST3	0.000260351	3.04216	0.77098	0.253	Resistant
SRCIN1	0.000567024	6.81733	4.1807	0.613	Resistant
SYT16	0.000660389	2.26477	0.41788	0.185	Resistant
DNAH7	0.000824055	4.43201	1.8696	0.422	Resistant
WWOX	0.001166	7.57013	6.4324	0.85	Resistant
PEX16	0.00121358	8.91668	8.37706	0.939	Resistant
KIAA0141	0.00129853	9.62072	8.76984	0.912	Resistant
CTNND2	0.00147533	3.45941	0.557	0.161	Resistant
ATP2A3	0.00161754	10.1765	8.4547	0.831	Resistant
FOXB1	0.00177996	0.97613	0	0	Resistant
LONRF2	0.00182248	6.42415	3.05846	0.476	Resistant
NDUFA2	0.00256573	9.74617	9.0953	0.933	Resistant
KIR3DX1	0.00336624	0.407365	0	0	Resistant
C3	0.00441642	13.3452	11.7736	0.882	Resistant
RGL4	0.00459093	3.45144	2.11228	0.612	Resistant
KIF3A	0.00501586	8.10115	7.2315	0.893	Resistant
BEND7	0.00505806	7.27221	4.37712	0.602	Resistant
PCM1	0.00512061	10.9331	10.1658	0.93	Resistant
PHYHIPL	0.0052605	3.61635	1.14636	0.317	Resistant
SLC35A4	0.00546538	10.9335	10.4122	0.952	Resistant
CCDC81	0.00563535	3.01226	1.78904	0.594	Resistant
OLFM3	0.00574163	0.69574	0	0	Resistant
SERGEF	0.0075304	7.80893	7.05968	0.904	Resistant
UBLCP1	0.00849089	9.66793	9.15284	0.947	Resistant
GKN2	0.00849827	3.48177	1.00962	0.29	Resistant
HNF4A	0.00876253	2.95334	0.8641	0.293	Resistant
DUSP4	0.00878768	9.11505	6.32396	0.694	Resistant
AJAP1	0.00938012	2.98321	1.07026	0.359	Resistant
TIAF1	0.00972452	8.44632	7.45838	0.883	Resistant
CREB3L2	0.00990018	11.5631	10.4752	0.906	Resistant
ZNF69	0.0100027	5.09527	3.2979	0.647	Resistant
ALX4	0.0101845	0.65874	0	0	Resistant
FAM160B1	0.010384	9.40889	8.80448	0.936	Resistant
UNC13B	0.0106394	10.4475	8.90874	0.853	Resistant
SEC62	0.0108451	11.9193	11.3257	0.95	Resistant
MYT1L	0.0112926	0.8011	0	0	Resistant
ITPK1	0.0134989	10.3725	9.6541	0.931	Resistant
HNRNPA1	0.014081	12.598	12.02	0.954	Resistant
RFK	0.0150345	9.8025	8.10336	0.827	Resistant
TMEM132E	0.0152493	2.87054	1.62552	0.566	Resistant
POMT2	0.0153637	8.94616	8.56662	0.958	Resistant
NSUN5	0.0154613	9.7304	9.30516	0.956	Resistant
SCN3B	0.0155844	4.33823	2.12154	0.489	Resistant
ARFIP2	0.0159143	10.2245	9.4324	0.923	Resistant
MAP3K15	0.0161472	1.87315	1.0592	0.565	Resistant
STC2	0.0161562	9.41464	8.25388	0.877	Resistant
TMEM132D	0.0163563	2.18961	0.55648	0.254	Resistant
TBCD	0.0165659	10.8541	10.3117	0.95	Resistant
LRPAP1	0.0168539	11.3896	10.7993	0.948	Resistant
CASP9	0.0169122	8.67098	7.92106	0.914	Resistant
LRRIQ4	0.0173021	2.44462	0.8226	0.336	Resistant
KSR2	0.0174258	4.54282	2.0248	0.446	Resistant
RMND5B	0.017956	9.27993	8.70506	0.938	Resistant
ERGIC1	0.0188233	12.2549	11.401	0.93	Resistant
C14orf105	0.0203345	0.745215	0	0	Resistant
NAP1L1	0.0205635	12.781	12.1521	0.951	Resistant
CMTM4	0.0220014	10.3922	9.07776	0.874	Resistant
RPL23	0.0223896	13.5246	12.824	0.948	Resistant
INSR	0.022965	10.5236	9.3316	0.887	Resistant
PAK3	0.0230282	2.27686	0.9994	0.439	Resistant
GNB2L1	0.0230616	14.3831	13.674	0.951	Resistant
SLC27A2	0.0232772	7.17094	5.47008	0.763	Resistant
ZDHHC21	0.0233297	7.29941	6.6102	0.906	Resistant
TPPP3	0.0233388	8.74793	7.39104	0.845	Resistant
DYNC2LI1	0.0234539	8.11837	7.47058	0.92	Resistant
NPTX1	0.0236211	6.39065	4.0006	0.626	Resistant
IRF4	0.0242285	7.07423	5.05118	0.714	Resistant
RAB3C	0.0256028	1.6835	0.54808	0.326	Resistant
DPP6	0.026252	2.14705	0.93382	0.435	Resistant
PURA	0.0269519	8.10579	7.74188	0.955	Resistant
MTHFR	0.0278861	9.33963	8.52348	0.913	Resistant
SHISA3	0.0287882	4.34682	2.51106	0.578	Resistant
CRCT1	0.0288834	2.32915	0.68408	0.294	Resistant
HIGD2A	0.0295022	10.0937	9.3114	0.923	Resistant
EDF1	0.0295206	11.8039	11.3582	0.962	Resistant
SPOCK2	0.0298346	9.66783	8.6545	0.895	Resistant
PTDSS2	0.0316752	9.26166	8.48218	0.916	Resistant
TRIM68	0.0327341	8.42388	7.58598	0.901	Resistant
ZNF302	0.0330143	8.74454	8.36292	0.956	Resistant
SEMA4G	0.0333435	7.8663	6.17874	0.785	Resistant
SMARCA1	0.0345107	10.5402	9.7956	0.929	Resistant
SLC35B4	0.0350392	8.78807	8.25728	0.94	Resistant
DDC	0.0355371	3.667	1.55528	0.424	Resistant
GABRA2	0.0365276	2.07912	0.49782	0.239	Resistant
CACNA1H	0.0367892	7.01952	5.49392	0.783	Resistant
NCKAP5L	0.0369371	9.36466	8.8868	0.949	Resistant
HNRNPA0	0.0371665	11.9113	11.3799	0.955	Resistant
MAGEH1	0.0383418	8.63629	7.93912	0.919	Resistant
TP53INP2	0.03844	10.0531	9.36654	0.932	Resistant
ZNF652	0.0400017	10.0661	9.62666	0.956	Resistant
CCL20	0.0403475	7.82353	6.25544	0.8	Resistant
KIFC3	0.0418136	9.95397	8.42478	0.846	Resistant
NUDT19	0.0424691	9.46388	9.01782	0.953	Resistant
NPM1	0.0436706	13.2921	12.7807	0.962	Resistant
GATA6	0.0439464	7.1894	5.26784	0.733	Resistant
RER1	0.0442394	11.3166	10.8657	0.96	Resistant
MYADM	0.0447305	11.4908	9.80956	0.854	Resistant
ATP9A	0.0448215	10.4935	9.96408	0.95	Resistant
FSD1L	0.0454398	5.92846	4.47126	0.754	Resistant
IER5	0.0457789	10.0103	9.38826	0.938	Resistant
MGAT4A	0.0460334	9.61894	8.10782	0.843	Resistant
PRKAR2B	0.0462805	7.28782	6.02634	0.827	Resistant
RAB11FIP1	0.0464839	11.24	10.4086	0.926	Resistant
MCF2L	0.0467496	9.03435	7.0667	0.782	Resistant
CSNK1D	0.0469928	11.9579	11.6675	0.976	Resistant
AKAP12	0.0481652	9.68038	7.37862	0.762	Resistant
SLC7A14	0.0481954	0.97465	0	0	Resistant
HRK	0.0483375	1.28447	0.33538	0.261	Resistant
RNF103	0.0485543	9.66984	9.26184	0.958	Resistant
TRIM52	0.0488286	7.13184	6.2303	0.874	Resistant
DISP2	0.0490411	5.4899	3.98382	0.726	Resistant
