# Supplementary material for: MicroRNA, mRNA, and Proteomics Biomarkers and Therapeutic Targets for Improving Lung Cancer Treatment Outcomes
Source: Cancers (Basel). 2023 Apr 14;15(8):2294. doi: 10.3390/cancers15082294 (PMC10137184; doi:10.3390/cancers15082294)
Supplement: Supplementary file 1 [file cancers-15-02294-s001.zip › S6. Prognostic genes.csv]

summary_all$gene	Xu_LUAD_RNAseq_DE_cate	Xu_LUAD_RNAseq_risk_cate	TCGA_LUAD_RNAseq_risk_cate	TCGA_LUSC_RNAseq_risk_cate	TCGA_NSCLC_RNAseq_risk_cate	Category
ACTB	NA	NA	Hazard	NA	Hazard	Hazard
ACTG1	NA	NA	Hazard	NA	Hazard	Hazard
ACTR2	HigherInTumor	NA	Hazard	NA	NA	Hazard
ADAM9	HigherInTumor	NA	Hazard	NA	NA	Hazard
AHSA1	HigherInTumor	NA	Hazard	NA	NA	Hazard
AJAP1	NA	NA	NA	Hazard	Hazard	Hazard
AKT1S1	NA	NA	Hazard	NA	Hazard	Hazard
AKT2	NA	NA	NA	Hazard	Hazard	Hazard
ALG10	HigherInTumor	NA	Hazard	NA	NA	Hazard
ALG3	HigherInTumor	NA	Hazard	NA	NA	Hazard
ARHGAP22	HigherInTumor	Hazard	NA	NA	NA	Hazard
ARL6IP1	NA	NA	Hazard	NA	Hazard	Hazard
ARL6IP6	HigherInTumor	NA	Hazard	NA	NA	Hazard
ASAP2	NA	NA	Hazard	NA	Hazard	Hazard
ASPH	NA	NA	Hazard	NA	Hazard	Hazard
ATL3	NA	NA	Hazard	NA	Hazard	Hazard
ATP2C1	HigherInTumor	Hazard	NA	NA	NA	Hazard
BACH1	NA	NA	Hazard	NA	Hazard	Hazard
BAI2	NA	NA	NA	Hazard	Hazard	Hazard
BRI3BP	NA	NA	Hazard	NA	Hazard	Hazard
BTBD3	NA	NA	NA	Hazard	Hazard	Hazard
C19orf48	HigherInTumor	NA	Hazard	NA	NA	Hazard
C7orf49	NA	NA	Hazard	NA	Hazard	Hazard
CAND1	HigherInTumor	NA	Hazard	NA	NA	Hazard
CBFB	HigherInTumor	NA	NA	NA	Hazard	Hazard
CBX3	HigherInTumor	NA	Hazard	NA	NA	Hazard
CCDC137	HigherInTumor	NA	Hazard	NA	NA	Hazard
CDC27	NA	NA	Hazard	NA	Hazard	Hazard
CDCA4	HigherInTumor	NA	Hazard	NA	NA	Hazard
CDCP1	NA	NA	Hazard	NA	Hazard	Hazard
CDH2	NA	Hazard	NA	NA	Hazard	Hazard
CENPI	NA	NA	Hazard	NA	Hazard	Hazard
CERCAM	HigherInTumor	Hazard	NA	NA	NA	Hazard
CHAF1A	HigherInTumor	NA	Hazard	NA	NA	Hazard
CISD1	HigherInTumor	NA	Hazard	NA	NA	Hazard
CKAP5	HigherInTumor	NA	Hazard	NA	NA	Hazard
CMAS	HigherInTumor	NA	Hazard	NA	NA	Hazard
CMIP	NA	NA	Hazard	NA	Hazard	Hazard
COL12A1	NA	NA	Hazard	NA	Hazard	Hazard
COL1A1	HigherInTumor	NA	NA	NA	Hazard	Hazard
COPB1	HigherInTumor	NA	NA	Hazard	NA	Hazard
CPEB4	HigherInTumor	NA	NA	Hazard	NA	Hazard
CSE1L	HigherInTumor	NA	Hazard	NA	NA	Hazard
CSNK1E	NA	NA	Hazard	NA	Hazard	Hazard
CSNK2A1	HigherInTumor	NA	NA	NA	Hazard	Hazard
CTSB	HigherInTumor	Hazard	NA	NA	NA	Hazard
DDIAS	HigherInTumor	Hazard	NA	NA	NA	Hazard
DDX21	HigherInTumor	NA	NA	NA	Hazard	Hazard
DEGS1	HigherInTumor	Hazard	NA	NA	NA	Hazard
DEPDC1	NA	NA	Hazard	NA	Hazard	Hazard
DHX36	HigherInTumor	NA	Hazard	NA	NA	Hazard
DIAPH1	HigherInTumor	NA	NA	NA	Hazard	Hazard
DLGAP5	NA	NA	Hazard	NA	Hazard	Hazard
DMWD	NA	NA	Hazard	NA	Hazard	Hazard
DNAJB11	HigherInTumor	NA	Hazard	NA	NA	Hazard
DSP	HigherInTumor	NA	Hazard	NA	NA	Hazard
EGLN1	NA	NA	Hazard	NA	Hazard	Hazard
EIF4G1	HigherInTumor	NA	Hazard	NA	NA	Hazard
EIF5A	NA	NA	Hazard	NA	Hazard	Hazard
EIF5B	HigherInTumor	NA	Hazard	NA	NA	Hazard
EIF6	NA	NA	Hazard	NA	Hazard	Hazard
ELAC2	HigherInTumor	Hazard	NA	NA	NA	Hazard
ELAVL1	HigherInTumor	Hazard	NA	NA	NA	Hazard
ELAVL2	HigherInTumor	Hazard	NA	NA	NA	Hazard
EPHB2	HigherInTumor	NA	NA	NA	Hazard	Hazard
ERGIC1	HigherInTumor	NA	NA	Hazard	NA	Hazard
ERO1L	NA	NA	Hazard	NA	Hazard	Hazard
FAM122B	HigherInTumor	Hazard	NA	NA	NA	Hazard
FAM162A	HigherInTumor	Hazard	NA	NA	NA	Hazard
FAM189B	HigherInTumor	NA	Hazard	NA	NA	Hazard
FAM65A	NA	NA	NA	Hazard	Hazard	Hazard
FAM91A1	HigherInTumor	NA	Hazard	NA	NA	Hazard
FBXL19	HigherInTumor	NA	Hazard	NA	NA	Hazard
FBXO45	HigherInTumor	NA	Hazard	NA	NA	Hazard
FKBP10	HigherInTumor	Hazard	NA	NA	NA	Hazard
FKBP3	HigherInTumor	NA	Hazard	NA	NA	Hazard
FOSL1	NA	NA	Hazard	NA	Hazard	Hazard
FOSL2	NA	NA	Hazard	NA	Hazard	Hazard
FRMD6	HigherInTumor	NA	Hazard	NA	NA	Hazard
FUBP3	NA	NA	Hazard	NA	Hazard	Hazard
FXR1	HigherInTumor	NA	Hazard	NA	NA	Hazard
GARS	HigherInTumor	NA	Hazard	NA	NA	Hazard
GDF2	NA	NA	NA	Hazard	Hazard	Hazard
GINS2	HigherInTumor	NA	Hazard	NA	NA	Hazard
GNB1	NA	NA	NA	Hazard	Hazard	Hazard
GOLT1B	HigherInTumor	NA	Hazard	NA	NA	Hazard
GPR137B	HigherInTumor	Hazard	NA	NA	NA	Hazard
GZF1	HigherInTumor	NA	NA	Hazard	NA	Hazard
HERC4	HigherInTumor	NA	NA	NA	Hazard	Hazard
HES4	NA	NA	Hazard	NA	Hazard	Hazard
HIST1H1B	HigherInTumor	Hazard	NA	NA	NA	Hazard
HIST1H2AG	HigherInTumor	Hazard	NA	NA	NA	Hazard
HIST1H2BO	HigherInTumor	NA	Hazard	NA	NA	Hazard
HIST1H3F	HigherInTumor	Hazard	NA	NA	NA	Hazard
HNRNPF	HigherInTumor	NA	Hazard	NA	NA	Hazard
HSP90B1	HigherInTumor	Hazard	NA	NA	NA	Hazard
HSPA2	NA	NA	Hazard	NA	Hazard	Hazard
HSPA5	HigherInTumor	NA	NA	NA	Hazard	Hazard
HSPA9	HigherInTumor	NA	Hazard	NA	NA	Hazard
IMPAD1	HigherInTumor	NA	Hazard	NA	NA	Hazard
IPO7	HigherInTumor	NA	NA	NA	Hazard	Hazard
IRAK1	HigherInTumor	Hazard	NA	NA	NA	Hazard
ITSN1	HigherInTumor	Hazard	NA	NA	NA	Hazard
KCMF1	HigherInTumor	NA	Hazard	NA	NA	Hazard
KIAA1524	NA	NA	Hazard	NA	Hazard	Hazard
LARP1	NA	NA	Hazard	NA	Hazard	Hazard
LIN9	HigherInTumor	NA	Hazard	NA	NA	Hazard
LMNB1	HigherInTumor	NA	Hazard	NA	NA	Hazard
LRP12	HigherInTumor	Hazard	NA	NA	NA	Hazard
MAEA	HigherInTumor	NA	NA	NA	Hazard	Hazard
MAFB	HigherInTumor	Hazard	NA	NA	NA	Hazard
MFF	HigherInTumor	NA	Hazard	NA	NA	Hazard
MMP1	HigherInTumor	NA	NA	NA	Hazard	Hazard
MMP10	HigherInTumor	Hazard	NA	NA	NA	Hazard
MPRIP	HigherInTumor	NA	NA	Hazard	NA	Hazard
MXD1	NA	NA	Hazard	NA	Hazard	Hazard
MYO19	HigherInTumor	NA	Hazard	NA	NA	Hazard
NAA30	HigherInTumor	NA	Hazard	NA	NA	Hazard
NAA50	HigherInTumor	NA	Hazard	NA	NA	Hazard
NCEH1	HigherInTumor	Hazard	NA	NA	NA	Hazard
NCKAP1	NA	NA	Hazard	NA	Hazard	Hazard
NCL	HigherInTumor	NA	Hazard	NA	NA	Hazard
NETO2	HigherInTumor	Hazard	NA	NA	NA	Hazard
NOL11	HigherInTumor	NA	Hazard	NA	NA	Hazard
NRBP1	HigherInTumor	Hazard	NA	NA	NA	Hazard
NUF2	NA	NA	Hazard	NA	Hazard	Hazard
OAS1	HigherInTumor	NA	Hazard	NA	NA	Hazard
OPA1	HigherInTumor	NA	Hazard	NA	NA	Hazard
PAICS	NA	NA	Hazard	NA	Hazard	Hazard
PDGFB	NA	NA	Hazard	NA	Hazard	Hazard
PDGFRB	HigherInTumor	Hazard	NA	NA	NA	Hazard
PDLIM5	HigherInTumor	NA	Hazard	NA	NA	Hazard
PERP	HigherInTumor	NA	Hazard	NA	NA	Hazard
PHB2	HigherInTumor	Hazard	NA	NA	NA	Hazard
PI3	NA	Hazard	Hazard	NA	NA	Hazard
PKM	HigherInTumor	Hazard	NA	NA	NA	Hazard
POFUT1	HigherInTumor	NA	Hazard	NA	NA	Hazard
PPIA	NA	NA	Hazard	NA	Hazard	Hazard
PPP1R18	HigherInTumor	Hazard	NA	NA	NA	Hazard
PPP2R1A	NA	NA	Hazard	NA	Hazard	Hazard
PRR11	NA	NA	Hazard	NA	Hazard	Hazard
PSAP	NA	Hazard	NA	Hazard	NA	Hazard
PSMA4	HigherInTumor	NA	Hazard	NA	NA	Hazard
PSMC6	HigherInTumor	NA	Hazard	NA	NA	Hazard
PSMD11	HigherInTumor	NA	Hazard	NA	NA	Hazard
PSMD12	NA	NA	Hazard	NA	Hazard	Hazard
PSRC1	NA	Hazard	Hazard	NA	NA	Hazard
PTDSS1	HigherInTumor	NA	Hazard	NA	NA	Hazard
PTGFRN	HigherInTumor	NA	Hazard	NA	NA	Hazard
PTTG1IP	NA	NA	Hazard	NA	Hazard	Hazard
RAB3B	HigherInTumor	NA	Hazard	NA	NA	Hazard
RAC1	NA	NA	Hazard	NA	Hazard	Hazard
RAD51AP1	HigherInTumor	NA	Hazard	NA	NA	Hazard
RAD54L	HigherInTumor	NA	Hazard	NA	NA	Hazard
RANBP1	HigherInTumor	NA	Hazard	NA	NA	Hazard
RBBP7	HigherInTumor	NA	Hazard	NA	NA	Hazard
RHBDF2	HigherInTumor	Hazard	NA	NA	NA	Hazard
RPGRIP1L	HigherInTumor	Hazard	NA	NA	NA	Hazard
RPN1	HigherInTumor	Hazard	NA	NA	NA	Hazard
RRP1B	HigherInTumor	NA	Hazard	NA	NA	Hazard
S100A11	HigherInTumor	NA	Hazard	NA	NA	Hazard
SCAF1	NA	NA	Hazard	NA	Hazard	Hazard
SCO1	NA	NA	Hazard	NA	Hazard	Hazard
SEC61A1	HigherInTumor	Hazard	NA	NA	NA	Hazard
SERPINB4	HigherInTumor	NA	Hazard	NA	NA	Hazard
SET	NA	NA	Hazard	NA	Hazard	Hazard
SFRP1	NA	Hazard	NA	NA	Hazard	Hazard
SKA2	HigherInTumor	NA	Hazard	NA	NA	Hazard
SLC15A4	HigherInTumor	NA	NA	NA	Hazard	Hazard
SLC27A4	NA	NA	Hazard	NA	Hazard	Hazard
SLC35B4	HigherInTumor	NA	NA	NA	Hazard	Hazard
SLC3A2	HigherInTumor	NA	Hazard	NA	NA	Hazard
SMG7	HigherInTumor	NA	Hazard	NA	NA	Hazard
SPAG5	NA	NA	Hazard	NA	Hazard	Hazard
SRM	HigherInTumor	Hazard	NA	NA	NA	Hazard
STRIP2	HigherInTumor	Hazard	NA	NA	NA	Hazard
STXBP5	HigherInTumor	NA	Hazard	NA	NA	Hazard
STYX	HigherInTumor	NA	Hazard	NA	NA	Hazard
SYT16	HigherInTumor	NA	Hazard	NA	NA	Hazard
TAB2	NA	NA	NA	Hazard	Hazard	Hazard
TAF2	NA	NA	Hazard	NA	Hazard	Hazard
TAP2	NA	NA	Hazard	NA	Hazard	Hazard
TBRG4	HigherInTumor	NA	Hazard	NA	NA	Hazard
TCP1	HigherInTumor	NA	Hazard	NA	NA	Hazard
TEX15	NA	NA	Hazard	NA	Hazard	Hazard
THBS1	NA	NA	NA	Hazard	Hazard	Hazard
TICRR	HigherInTumor	Hazard	NA	NA	NA	Hazard
TMEM106B	HigherInTumor	NA	Hazard	NA	NA	Hazard
TMLHE	HigherInTumor	Hazard	NA	NA	NA	Hazard
TNIP1	NA	NA	NA	Hazard	Hazard	Hazard
TPD52L2	HigherInTumor	NA	NA	NA	Hazard	Hazard
TPX2	NA	NA	Hazard	NA	Hazard	Hazard
TRIM28	NA	NA	Hazard	NA	Hazard	Hazard
TRIP13	HigherInTumor	NA	Hazard	NA	NA	Hazard
TSC22D2	NA	NA	Hazard	NA	Hazard	Hazard
TSKU	HigherInTumor	NA	Hazard	NA	NA	Hazard
TSR1	NA	NA	Hazard	NA	Hazard	Hazard
TUBB2A	HigherInTumor	Hazard	NA	NA	NA	Hazard
TXNRD1	HigherInTumor	NA	Hazard	NA	NA	Hazard
UBQLN1	NA	NA	Hazard	NA	Hazard	Hazard
UCHL1	HigherInTumor	Hazard	NA	NA	NA	Hazard
UGGT2	NA	NA	NA	Hazard	Hazard	Hazard
UNG	HigherInTumor	NA	Hazard	NA	NA	Hazard
UROS	HigherInTumor	Hazard	NA	NA	NA	Hazard
WDR41	NA	Hazard	NA	NA	Hazard	Hazard
WDR43	HigherInTumor	NA	Hazard	NA	NA	Hazard
WHSC1	NA	NA	Hazard	NA	Hazard	Hazard
XPNPEP3	HigherInTumor	NA	Hazard	NA	NA	Hazard
XRCC6	HigherInTumor	NA	Hazard	NA	NA	Hazard
YDJC	HigherInTumor	NA	Hazard	NA	NA	Hazard
YWHAZ	NA	NA	Hazard	NA	Hazard	Hazard
ZAK	NA	NA	Hazard	NA	Hazard	Hazard
ZC3H18	HigherInTumor	NA	NA	NA	Hazard	Hazard
ZNF28	NA	NA	NA	Hazard	Hazard	Hazard
ZNF367	HigherInTumor	NA	Hazard	NA	NA	Hazard
ZNF813	NA	NA	NA	Hazard	Hazard	Hazard
ACSL3	HigherInTumor	NA	Hazard	NA	Hazard	Hazard
ADAM10	NA	NA	Hazard	Hazard	Hazard	Hazard
AKAP12	NA	NA	Hazard	Hazard	Hazard	Hazard
AP2B1	HigherInTumor	NA	Hazard	NA	Hazard	Hazard
AP2M1	HigherInTumor	Hazard	Hazard	NA	NA	Hazard
BIRC3	HigherInTumor	NA	Hazard	NA	Hazard	Hazard
BUB3	HigherInTumor	NA	Hazard	NA	Hazard	Hazard
CALU	HigherInTumor	Hazard	Hazard	NA	NA	Hazard
CAPZA1	HigherInTumor	NA	Hazard	NA	Hazard	Hazard
CCT2	HigherInTumor	NA	Hazard	NA	Hazard	Hazard
CCT4	HigherInTumor	Hazard	Hazard	NA	NA	Hazard
CCT6A	HigherInTumor	NA	Hazard	NA	Hazard	Hazard
CD276	NA	Hazard	Hazard	NA	Hazard	Hazard
CDC25A	HigherInTumor	Hazard	Hazard	NA	NA	Hazard
CDC6	HigherInTumor	NA	Hazard	NA	Hazard	Hazard
CDK1	HigherInTumor	NA	Hazard	NA	Hazard	Hazard
CDX2	HigherInTumor	NA	Hazard	NA	Hazard	Hazard
CENPK	HigherInTumor	NA	Hazard	NA	Hazard	Hazard
CLPTM1	HigherInTumor	NA	Hazard	NA	Hazard	Hazard
COL5A2	HigherInTumor	NA	Hazard	NA	Hazard	Hazard
DIAPH3	HigherInTumor	NA	Hazard	NA	Hazard	Hazard
DTL	HigherInTumor	NA	Hazard	NA	Hazard	Hazard
DUSP5	NA	NA	Hazard	Hazard	Hazard	Hazard
EGLN3	HigherInTumor	NA	Hazard	NA	Hazard	Hazard
EPHA2	NA	NA	Hazard	Hazard	Hazard	Hazard
FAF2	HigherInTumor	NA	Hazard	NA	Hazard	Hazard
FAM111B	HigherInTumor	NA	Hazard	NA	Hazard	Hazard
FBXO5	HigherInTumor	NA	Hazard	NA	Hazard	Hazard
FUCA2	HigherInTumor	NA	Hazard	NA	Hazard	Hazard
G3BP1	HigherInTumor	NA	Hazard	NA	Hazard	Hazard
GREB1L	HigherInTumor	NA	Hazard	NA	Hazard	Hazard
GTSE1	HigherInTumor	NA	Hazard	NA	Hazard	Hazard
HCN2	HigherInTumor	NA	Hazard	NA	Hazard	Hazard
HNF4A	NA	NA	Hazard	Hazard	Hazard	Hazard
HNRNPK	HigherInTumor	NA	Hazard	NA	Hazard	Hazard
HOXA9	HigherInTumor	NA	Hazard	NA	Hazard	Hazard
HOXB9	HigherInTumor	NA	Hazard	NA	Hazard	Hazard
HPRT1	HigherInTumor	Hazard	Hazard	NA	NA	Hazard
ID1	NA	NA	Hazard	Hazard	Hazard	Hazard
INHBA	NA	Hazard	NA	Hazard	Hazard	Hazard
ITGAV	HigherInTumor	Hazard	Hazard	NA	NA	Hazard
KIF20B	HigherInTumor	NA	Hazard	NA	Hazard	Hazard
KLF10	NA	NA	Hazard	Hazard	Hazard	Hazard
KPNB1	HigherInTumor	NA	Hazard	NA	Hazard	Hazard
LASP1	HigherInTumor	NA	NA	Hazard	Hazard	Hazard
LDLRAD3	HigherInTumor	NA	Hazard	NA	Hazard	Hazard
MAPRE1	HigherInTumor	Hazard	NA	NA	Hazard	Hazard
MARK2	HigherInTumor	NA	Hazard	NA	Hazard	Hazard
MCM4	HigherInTumor	NA	Hazard	NA	Hazard	Hazard
MESDC1	NA	NA	Hazard	Hazard	Hazard	Hazard
MKI67	HigherInTumor	NA	Hazard	NA	Hazard	Hazard
MTA2	HigherInTumor	Hazard	Hazard	NA	NA	Hazard
MTHFD2	HigherInTumor	Hazard	Hazard	NA	NA	Hazard
MTMR2	HigherInTumor	NA	Hazard	NA	Hazard	Hazard
NLN	HigherInTumor	Hazard	Hazard	NA	NA	Hazard
OLAH	NA	NA	Hazard	Hazard	Hazard	Hazard
PABPC1	HigherInTumor	NA	Hazard	NA	Hazard	Hazard
PCDH7	HigherInTumor	NA	Hazard	NA	Hazard	Hazard
POLD2	HigherInTumor	NA	Hazard	NA	Hazard	Hazard
PSMB2	HigherInTumor	NA	Hazard	NA	Hazard	Hazard
PTBP1	HigherInTumor	NA	Hazard	NA	Hazard	Hazard
PTGES3	HigherInTumor	NA	Hazard	NA	Hazard	Hazard
RCOR1	HigherInTumor	NA	Hazard	NA	Hazard	Hazard
RELT	HigherInTumor	Hazard	NA	Hazard	NA	Hazard
RHOV	HigherInTumor	NA	Hazard	NA	Hazard	Hazard
RRM1	HigherInTumor	Hazard	Hazard	NA	NA	Hazard
RRM2	HigherInTumor	NA	Hazard	NA	Hazard	Hazard
RUVBL1	HigherInTumor	Hazard	Hazard	NA	NA	Hazard
SERPINE1	NA	NA	Hazard	Hazard	Hazard	Hazard
SERPINH1	HigherInTumor	NA	Hazard	NA	Hazard	Hazard
SLC39A14	HigherInTumor	Hazard	Hazard	NA	NA	Hazard
SMARCAL1	HigherInTumor	NA	Hazard	NA	Hazard	Hazard
SMC2	HigherInTumor	Hazard	Hazard	NA	NA	Hazard
SMOX	HigherInTumor	NA	Hazard	NA	Hazard	Hazard
STC1	NA	Hazard	Hazard	NA	Hazard	Hazard
STK38L	HigherInTumor	NA	Hazard	NA	Hazard	Hazard
STRAP	HigherInTumor	NA	Hazard	NA	Hazard	Hazard
TFAM	HigherInTumor	NA	Hazard	NA	Hazard	Hazard
TM9SF3	HigherInTumor	NA	Hazard	NA	Hazard	Hazard
TNPO1	HigherInTumor	NA	Hazard	NA	Hazard	Hazard
TRAF7	HigherInTumor	NA	Hazard	NA	Hazard	Hazard
TTK	HigherInTumor	NA	Hazard	NA	Hazard	Hazard
UBAC2	HigherInTumor	NA	Hazard	NA	Hazard	Hazard
UBE2D1	HigherInTumor	NA	Hazard	NA	Hazard	Hazard
UBE2E3	HigherInTumor	NA	Hazard	NA	Hazard	Hazard
UBE2G1	HigherInTumor	NA	Hazard	NA	Hazard	Hazard
UBE2K	HigherInTumor	NA	Hazard	NA	Hazard	Hazard
USP14	HigherInTumor	NA	Hazard	NA	Hazard	Hazard
WDHD1	HigherInTumor	NA	Hazard	NA	Hazard	Hazard
XRCC5	HigherInTumor	NA	Hazard	NA	Hazard	Hazard
YKT6	HigherInTumor	NA	Hazard	NA	Hazard	Hazard
YWHAG	HigherInTumor	NA	Hazard	NA	Hazard	Hazard
ZNF525	HigherInTumor	NA	NA	Hazard	Hazard	Hazard
ANLN	HigherInTumor	Hazard	Hazard	NA	Hazard	Hazard
ARHGAP11A	HigherInTumor	Hazard	Hazard	NA	Hazard	Hazard
ARNTL2	HigherInTumor	Hazard	Hazard	NA	Hazard	Hazard
ASPM	HigherInTumor	Hazard	Hazard	NA	Hazard	Hazard
BUB1	HigherInTumor	Hazard	Hazard	NA	Hazard	Hazard
CCNB1	HigherInTumor	Hazard	Hazard	NA	Hazard	Hazard
CCNB2	HigherInTumor	Hazard	Hazard	NA	Hazard	Hazard
CDC20	HigherInTumor	Hazard	Hazard	NA	Hazard	Hazard
CDCA8	HigherInTumor	Hazard	Hazard	NA	Hazard	Hazard
CDKN3	HigherInTumor	Hazard	Hazard	NA	Hazard	Hazard
CENPF	HigherInTumor	Hazard	Hazard	NA	Hazard	Hazard
CEP55	HigherInTumor	Hazard	Hazard	NA	Hazard	Hazard
CFL1	HigherInTumor	Hazard	Hazard	NA	Hazard	Hazard
CKAP4	HigherInTumor	Hazard	Hazard	NA	Hazard	Hazard
COL4A1	HigherInTumor	Hazard	Hazard	NA	Hazard	Hazard
COL5A1	HigherInTumor	Hazard	Hazard	NA	Hazard	Hazard
DNAJC9	HigherInTumor	Hazard	Hazard	NA	Hazard	Hazard
E2F7	HigherInTumor	Hazard	Hazard	NA	Hazard	Hazard
EXO1	HigherInTumor	Hazard	Hazard	NA	Hazard	Hazard
FSCN1	HigherInTumor	Hazard	Hazard	NA	Hazard	Hazard
GALNT2	HigherInTumor	Hazard	Hazard	NA	Hazard	Hazard
GANAB	HigherInTumor	Hazard	Hazard	NA	Hazard	Hazard
GAPDH	HigherInTumor	Hazard	Hazard	NA	Hazard	Hazard
H2AFX	HigherInTumor	Hazard	Hazard	NA	Hazard	Hazard
HMGA1	HigherInTumor	Hazard	Hazard	NA	Hazard	Hazard
IGF2BP1	HigherInTumor	Hazard	Hazard	NA	Hazard	Hazard
KIF18A	HigherInTumor	Hazard	Hazard	NA	Hazard	Hazard
KIF18B	HigherInTumor	Hazard	Hazard	NA	Hazard	Hazard
KIF20A	HigherInTumor	Hazard	Hazard	NA	Hazard	Hazard
KIF23	HigherInTumor	Hazard	Hazard	NA	Hazard	Hazard
KIF4A	HigherInTumor	Hazard	Hazard	NA	Hazard	Hazard
LDHA	HigherInTumor	Hazard	Hazard	NA	Hazard	Hazard
LOX	HigherInTumor	Hazard	Hazard	NA	Hazard	Hazard
MYBL2	HigherInTumor	Hazard	Hazard	NA	Hazard	Hazard
NCAPG	HigherInTumor	Hazard	Hazard	NA	Hazard	Hazard
P4HA1	HigherInTumor	Hazard	Hazard	NA	Hazard	Hazard
PACS1	HigherInTumor	Hazard	Hazard	NA	Hazard	Hazard
PBK	HigherInTumor	Hazard	Hazard	NA	Hazard	Hazard
PFKP	HigherInTumor	Hazard	Hazard	NA	Hazard	Hazard
PLK1	HigherInTumor	Hazard	Hazard	NA	Hazard	Hazard
PLK4	HigherInTumor	Hazard	Hazard	NA	Hazard	Hazard
PLOD2	HigherInTumor	Hazard	Hazard	NA	Hazard	Hazard
PRC1	HigherInTumor	Hazard	Hazard	NA	Hazard	Hazard
RASA1	HigherInTumor	Hazard	NA	Hazard	Hazard	Hazard
RPS6KA4	HigherInTumor	Hazard	Hazard	NA	Hazard	Hazard
SHCBP1	HigherInTumor	Hazard	Hazard	NA	Hazard	Hazard
SKA3	HigherInTumor	Hazard	Hazard	NA	Hazard	Hazard
SLC16A3	HigherInTumor	Hazard	Hazard	NA	Hazard	Hazard
SLC2A1	HigherInTumor	Hazard	Hazard	NA	Hazard	Hazard
SNAI1	NA	Hazard	Hazard	Hazard	Hazard	Hazard
SPC25	HigherInTumor	Hazard	Hazard	NA	Hazard	Hazard
STC2	HigherInTumor	Hazard	Hazard	NA	Hazard	Hazard
STK24	HigherInTumor	NA	Hazard	Hazard	Hazard	Hazard
TFG	HigherInTumor	Hazard	Hazard	NA	Hazard	Hazard
TOP2A	HigherInTumor	Hazard	Hazard	NA	Hazard	Hazard
UBE2S	HigherInTumor	Hazard	Hazard	NA	Hazard	Hazard
UCK2	HigherInTumor	Hazard	Hazard	NA	Hazard	Hazard
VCL	HigherInTumor	Hazard	Hazard	NA	Hazard	Hazard
VDAC1	HigherInTumor	Hazard	Hazard	NA	Hazard	Hazard
YWHAE	HigherInTumor	Hazard	Hazard	NA	Hazard	Hazard
ZWINT	HigherInTumor	Hazard	Hazard	NA	Hazard	Hazard
ABCA5	NA	NA	Protective	NA	Protective	Protective
ACADSB	NA	NA	Protective	NA	Protective	Protective
ADH7	NA	NA	Protective	Protective	NA	Protective
AK2	NA	NA	Protective	NA	Protective	Protective
AKAP8	NA	NA	Protective	NA	Protective	Protective
APH1B	HigherInNormal	NA	Protective	NA	NA	Protective
AQP4	HigherInNormal	NA	Protective	NA	NA	Protective
ARVCF	NA	NA	Protective	NA	Protective	Protective
ASB16	NA	NA	Protective	NA	Protective	Protective
ATP13A5	NA	NA	NA	Protective	Protective	Protective
BEND5	NA	NA	Protective	NA	Protective	Protective
BEND7	HigherInNormal	Protective	NA	NA	NA	Protective
CACNB4	NA	NA	Protective	NA	Protective	Protective
CAMTA1	NA	NA	Protective	NA	Protective	Protective
CCDC81	HigherInNormal	NA	Protective	NA	NA	Protective
CCND2	NA	NA	Protective	NA	Protective	Protective
CDC37L1	NA	Protective	Protective	NA	NA	Protective
CDIPT	HigherInNormal	Protective	NA	NA	NA	Protective
CLASP2	HigherInNormal	NA	Protective	NA	NA	Protective
CPEB3	NA	NA	Protective	NA	Protective	Protective
CTSF	HigherInNormal	NA	Protective	NA	NA	Protective
DCN	HigherInNormal	NA	Protective	NA	NA	Protective
DDX24	NA	NA	Protective	NA	Protective	Protective
DYRK3	HigherInNormal	NA	Protective	NA	NA	Protective
EPHX1	NA	NA	Protective	NA	Protective	Protective
ERG	HigherInNormal	NA	Protective	NA	NA	Protective
EXPH5	NA	NA	Protective	NA	Protective	Protective
EZH1	NA	NA	Protective	NA	Protective	Protective
FAM126B	NA	NA	Protective	NA	Protective	Protective
FAM13B	NA	NA	Protective	NA	Protective	Protective
FBLN5	HigherInNormal	NA	Protective	NA	NA	Protective
FBXL3	HigherInNormal	Protective	NA	NA	NA	Protective
FBXO33	NA	NA	Protective	NA	Protective	Protective
FMO2	HigherInNormal	NA	Protective	NA	NA	Protective
FYCO1	HigherInNormal	NA	Protective	NA	NA	Protective
GGA2	NA	NA	Protective	NA	Protective	Protective
GGT6	NA	NA	Protective	NA	Protective	Protective
GIGYF1	NA	NA	Protective	NA	Protective	Protective
GLCCI1	NA	NA	Protective	NA	Protective	Protective
GPR75	NA	NA	Protective	NA	Protective	Protective
GUCY1A3	NA	NA	Protective	NA	Protective	Protective
HEATR5B	NA	NA	Protective	NA	Protective	Protective
ID2	HigherInNormal	NA	Protective	NA	NA	Protective
IKZF5	NA	Protective	Protective	NA	NA	Protective
INPP5A	HigherInNormal	NA	Protective	NA	NA	Protective
IP6K1	HigherInNormal	NA	Protective	NA	NA	Protective
IP6K2	NA	NA	Protective	NA	Protective	Protective
IVD	NA	NA	Protective	NA	Protective	Protective
KCNJ11	NA	NA	Protective	NA	Protective	Protective
KCTD12	HigherInNormal	NA	Protective	NA	NA	Protective
KIAA0247	NA	NA	Protective	NA	Protective	Protective
KIAA1109	NA	Protective	Protective	NA	NA	Protective
KITLG	NA	NA	Protective	NA	Protective	Protective
KLHDC8B	NA	NA	Protective	NA	Protective	Protective
LAMA2	HigherInNormal	NA	Protective	NA	NA	Protective
LIFR	NA	NA	Protective	NA	Protective	Protective
LPL	HigherInNormal	NA	Protective	NA	NA	Protective
MACF1	HigherInNormal	Protective	NA	NA	NA	Protective
MAT2A	NA	NA	Protective	NA	Protective	Protective
MBIP	NA	NA	Protective	NA	Protective	Protective
MECP2	HigherInNormal	NA	Protective	NA	NA	Protective
MED26	NA	NA	Protective	NA	Protective	Protective
METTL7A	NA	NA	Protective	NA	Protective	Protective
MFSD6	NA	NA	Protective	NA	Protective	Protective
MGMT	HigherInNormal	NA	Protective	NA	NA	Protective
MTMR10	NA	NA	Protective	NA	Protective	Protective
MTUS1	NA	NA	Protective	NA	Protective	Protective
MYL5	NA	NA	Protective	NA	Protective	Protective
NCKAP5L	HigherInNormal	NA	Protective	NA	NA	Protective
NEUROD1	NA	NA	Protective	NA	Protective	Protective
NISCH	NA	NA	Protective	NA	Protective	Protective
NTRK2	NA	NA	Protective	Protective	NA	Protective
NXF1	NA	NA	Protective	NA	Protective	Protective
PARD6B	HigherInNormal	Protective	NA	NA	NA	Protective
PCBP4	HigherInNormal	NA	Protective	NA	NA	Protective
PEF1	HigherInNormal	NA	Protective	NA	NA	Protective
PELI1	NA	NA	Protective	NA	Protective	Protective
PID1	HigherInNormal	NA	Protective	NA	NA	Protective
PIK3R1	NA	NA	Protective	NA	Protective	Protective
PPP2R5A	HigherInNormal	NA	Protective	NA	NA	Protective
PRTG	HigherInNormal	Protective	NA	NA	NA	Protective
PXK	NA	NA	Protective	NA	Protective	Protective
RAB40B	NA	NA	Protective	NA	Protective	Protective
RMND5B	HigherInNormal	Protective	NA	NA	NA	Protective
ROBO2	HigherInNormal	NA	Protective	NA	NA	Protective
RORA	NA	NA	Protective	NA	Protective	Protective
RTN1	HigherInNormal	NA	Protective	NA	NA	Protective
RUFY3	NA	Protective	Protective	NA	NA	Protective
SCAPER	NA	Protective	Protective	NA	NA	Protective
SELK	NA	NA	Protective	NA	Protective	Protective
SERP1	NA	NA	NA	Protective	Protective	Protective
SESN1	HigherInNormal	NA	Protective	NA	NA	Protective
SGK3	NA	NA	Protective	NA	Protective	Protective
SLC11A2	NA	NA	Protective	NA	Protective	Protective
SLC40A1	HigherInNormal	Protective	NA	NA	NA	Protective
SLC7A8	NA	NA	Protective	NA	Protective	Protective
SLITRK5	NA	NA	NA	Protective	Protective	Protective
SNX25	HigherInNormal	Protective	NA	NA	NA	Protective
SNX30	NA	NA	Protective	NA	Protective	Protective
SORL1	NA	NA	Protective	NA	Protective	Protective
SPOCK2	HigherInNormal	NA	Protective	NA	NA	Protective
TFEB	HigherInNormal	NA	Protective	NA	NA	Protective
TMEM130	NA	NA	Protective	NA	Protective	Protective
TMEM132D	NA	NA	Protective	NA	Protective	Protective
TPPP	NA	NA	Protective	NA	Protective	Protective
TTC39B	NA	Protective	NA	NA	Protective	Protective
UCHL3	HigherInNormal	Protective	NA	NA	NA	Protective
UNC13B	NA	NA	Protective	NA	Protective	Protective
UPRT	NA	NA	Protective	NA	Protective	Protective
VEZF1	HigherInNormal	Protective	NA	NA	NA	Protective
VPS13D	NA	Protective	Protective	NA	NA	Protective
WDR47	NA	NA	Protective	NA	Protective	Protective
ZAP70	NA	NA	Protective	NA	Protective	Protective
ZCCHC24	HigherInNormal	NA	Protective	NA	NA	Protective
ZNF10	NA	NA	Protective	NA	Protective	Protective
ZNF106	HigherInNormal	Protective	NA	NA	NA	Protective
ZNF483	NA	NA	Protective	NA	Protective	Protective
ZNF490	NA	NA	Protective	NA	Protective	Protective
ZNF555	NA	NA	Protective	NA	Protective	Protective
ZNF700	NA	NA	Protective	NA	Protective	Protective
ZSCAN18	HigherInNormal	NA	Protective	NA	NA	Protective
ZSCAN21	NA	NA	NA	Protective	Protective	Protective
ARIH2	HigherInNormal	NA	Protective	NA	Protective	Protective
BTG2	HigherInNormal	NA	Protective	NA	Protective	Protective
CCDC28A	HigherInNormal	NA	Protective	NA	Protective	Protective
CD69	HigherInNormal	NA	Protective	NA	Protective	Protective
CIRBP	HigherInNormal	NA	Protective	NA	Protective	Protective
FAM76A	NA	Protective	Protective	NA	Protective	Protective
LIMD1	HigherInNormal	NA	Protective	NA	Protective	Protective
MAGEH1	HigherInNormal	NA	Protective	NA	Protective	Protective
MAPRE3	HigherInNormal	NA	Protective	NA	Protective	Protective
MOAP1	HigherInNormal	NA	Protective	NA	Protective	Protective
MYLIP	NA	Protective	Protective	NA	Protective	Protective
NDRG2	HigherInNormal	NA	Protective	NA	Protective	Protective
NECAB3	HigherInNormal	NA	Protective	NA	Protective	Protective
PRKCE	HigherInNormal	NA	Protective	NA	Protective	Protective
RAB11FIP1	HigherInNormal	NA	Protective	NA	Protective	Protective
REV1	NA	Protective	Protective	NA	Protective	Protective
RPS6KA5	NA	NA	Protective	Protective	Protective	Protective
SLC25A23	NA	Protective	Protective	NA	Protective	Protective
SNRPN	HigherInNormal	NA	Protective	NA	Protective	Protective
SYNE1	HigherInNormal	Protective	Protective	NA	NA	Protective
TMEM168	NA	NA	Protective	Protective	Protective	Protective
ZNRF3	NA	Protective	Protective	NA	Protective	Protective
CD9	HigherInNormal	NA	Protective	Protective	Protective	Protective
EPHX2	HigherInNormal	Protective	Protective	NA	Protective	Protective
NFIB	HigherInNormal	Protective	Protective	NA	Protective	Protective
NR3C2	HigherInNormal	Protective	Protective	NA	Protective	Protective
