# Supplementary material for: MicroRNA, mRNA, and Proteomics Biomarkers and Therapeutic Targets for Improving Lung Cancer Treatment Outcomes
Source: Cancers (Basel). 2023 Apr 14;15(8):2294. doi: 10.3390/cancers15082294 (PMC10137184; doi:10.3390/cancers15082294)
Supplement: Supplementary file 1 [file cancers-15-02294-s001.zip › S7. CMap results.xlsx]

## Sheet: CMap Input Lists
CMap Input List 1			CMap Input List 2
Up List (Category = Protective & nonNAcount > 1, CRISPRcount & RNAicount < 50%; n = 100)	Down List (Category = Hazard & nonNAcount > 1, CRISPRcount & RNAicount > 50%; n = 35)		Up List (Category = Protective & nonNAcount > 1, CRISPRcount & RNAicount = 0; n = 85)	Down List (Category = Hazard & nonNAcount > 1, CRISPRcount or RNAicount > 50%; n = 79)
ACADSB	CCT4		ACADSB	ACTB
ADH7	CDC27		ADH7	ACTG1
AK2	CDK1		AKAP8	ACTR2
AKAP8	CHAF1A		ARVCF	BUB1
APH1B	CKAP5		ASB16	BUB3
ARIH2	COPB1		CACNB4	CCNB1
ARVCF	CSE1L		CAMTA1	CCT2
ASB16	EIF6		CCDC28A	CCT4
BTG2	FBXO5		CD69	CDC27
CACNB4	GAPDH		CD9	CDCA8
CAMTA1	GINS2		CTSF	CDK1
CCDC28A	HNRNPK		DCN	CENPK
CCND2	HSPA9		DYRK3	CFL1
CD69	IPO7		EPHX1	CHAF1A
CD9	KPNB1		EPHX2	CKAP5
CIRBP	NAA50		ERG	COPB1
CTSF	NCL		EXPH5	CSE1L
DCN	NUF2		FAM13B	DHX36
DYRK3	PHB2		FBXL3	DNAJC9
EPHX1	PPP2R1A		FBXO33	EIF4G1
EPHX2	PRC1		FMO2	EIF5A
ERG	PSMA4		FYCO1	EIF5B
EXPH5	PSMB2		GGA2	EIF6
FAM13B	PSMC6		GGT6	ELAC2
FBXL3	PSMD11		GLCCI1	FAM91A1
FBXO33	PSMD12		GPR75	FBXO5
FMO2	RRM1		HEATR5B	GAPDH
FYCO1	RRM2		ID2	GINS2
GGA2	RUVBL1		IKZF5	HMGA1
GGT6	SEC61A1		INPP5A	HNRNPK
GIGYF1	SKA2		IP6K1	HSPA5
GLCCI1	SMC2		IVD	HSPA9
GPR75	SPC25		KCNJ11	IPO7
HEATR5B	XRCC6		KCTD12	KCMF1
ID2	ZC3H18		KITLG	KIF18A
IKZF5			LAMA2	KIF23
INPP5A			LIFR	KPNB1
IP6K1			LIMD1	MCM4
IP6K2			LPL	MYBL2
IVD			MACF1	NAA50
KCNJ11			MECP2	NCAPG
KCTD12			MOAP1	NCL
KITLG			MTMR10	NRBP1
LAMA2			MTUS1	NUF2
LIFR			MYL5	PABPC1
LIMD1			MYLIP	PHB2
LPL			NDRG2	PKM
MACF1			NECAB3	PLK4
MECP2			NFIB	PPP2R1A
MGMT			NR3C2	PRC1
MOAP1			NTRK2	PSMA4
MTMR10			PCBP4	PSMB2
MTUS1			PIK3R1	PSMC6
MYL5			PPP2R5A	PSMD11
MYLIP			PRKCE	PSMD12
NDRG2			PXK	RAC1
NECAB3			RAB11FIP1	RRM1
NFIB			RAB40B	RRM2
NR3C2			RORA	RUVBL1
NTRK2			RTN1	SEC61A1
PARD6B			RUFY3	SKA2
PCBP4			SCAPER	SKA3
PEF1			SESN1	SMC2
PIK3R1			SLC11A2	SPC25
PPP2R5A			SLC25A23	STRAP
PRKCE			SLC40A1	TAF2
PXK			SLC7A8	TICRR
RAB11FIP1			SLITRK5	TOP2A
RAB40B			SNX25	TPX2
REV1			SORL1	TTK
RORA			SPOCK2	UBE2S
RTN1			SYNE1	VDAC1
RUFY3			TFEB	WDHD1
SCAPER			TMEM132D	XRCC5
SERP1			TMEM168	XRCC6
SESN1			TPPP	YKT6
SLC11A2			TTC39B	YWHAE
SLC25A23			UCHL3	YWHAZ
SLC40A1			ZNF10	ZC3H18
SLC7A8			ZNF106
SLITRK5			ZNF483
SNX25			ZNF490
SORL1			ZNF555
SPOCK2			ZNF700
SYNE1			ZSCAN18
TFEB
TMEM130
TMEM132D
TMEM168
TPPP
TTC39B
UCHL3
ZCCHC24
ZNF10
ZNF106
ZNF483
ZNF490
ZNF555
ZNF700
ZSCAN18

## Sheet: List1 NSCLC Significant Outputs
id	set_type	set_size	src_set_size	num_hiq_sig	pct_hiq_sig	num_uniq_pert	pct_src_pert	src_set_id	cell_iname	pert_type	is_filtered_set	desc	raw_cs	fdr_q_nlog10	norm_cs	Previously published (PMID)
ATM_KINASE_INHIBITOR:HCC515:TRT_CP	MOA_CLASS	4	4	4	100	4	100	ATM_KINASE_INHIBITOR	HCC515	TRT_CP	TRUE	ATM_KINASE_INHIBITOR:HCC515:trt_cp	0.9063	0.8283	1.4304	-
BIOCARTA_BCELLSURVIVAL_PATHWAY:HCC515:TRT_SH.CGS	PATHWAY_SET	6	16	4	66.6667	6	37.5	BIOCARTA_BCELLSURVIVAL_PATHWAY	HCC515	TRT_SH.CGS	TRUE	BIOCARTA_BCELLSURVIVAL_PATHWAY:HCC515:trt_sh.cgs	0.9517	1.1539	1.7068	-
CP_IKK_INHIBITOR:A549:TRT_CP	PCL	5	5	4	80	4	80	CP_IKK_INHIBITOR	A549	TRT_CP	TRUE	CP_IKK_INHIBITOR:A549:trt_cp	0.977	1.0673	1.6371	-
CP_LEUCINE_RICH_REPEAT_KINASE_INHIBITOR:HCC515:TRT_CP	PCL	3	3	3	100	3	100	CP_LEUCINE_RICH_REPEAT_KINASE_INHIBITOR	HCC515	TRT_CP	TRUE	CP_LEUCINE_RICH_REPEAT_KINASE_INHIBITOR:HCC515:trt_cp	0.9931	0.8286	1.4316	-
HISTONE_DEMETHYLASE_INHIBITOR:HCC515:TRT_CP	MOA_CLASS	3	5	2	66.6667	3	60	HISTONE_DEMETHYLASE_INHIBITOR	HCC515	TRT_CP	TRUE	HISTONE_DEMETHYLASE_INHIBITOR:HCC515:trt_cp	0.9452	0.7482	1.3626	-
KD_CANONICAL_HIGH_MOBILITY_GROUP_PROTEINS:HCC515:TRT_SH.CGS	PCL	3	3	2	66.6667	3	100	KD_CANONICAL_HIGH_MOBILITY_GROUP_PROTEINS	HCC515	TRT_SH.CGS	TRUE	KD_CANONICAL_HIGH_MOBILITY_GROUP_PROTEINS:HCC515:trt_sh.cgs	0.9381	0.7361	1.3523	-
PID_PDGFRA_PATHWAY:HCC515:TRT_SH.CGS	PATHWAY_SET	7	22	3	42.8571	7	31.8182	PID_PDGFRA_PATHWAY	HCC515	TRT_SH.CGS	TRUE	PID_PDGFRA_PATHWAY:HCC515:trt_sh.cgs	0.9224	1.1881	1.7436	-
PID_TCR_JNK_PATHWAY:HCC515:TRT_SH.CGS	PATHWAY_SET	6	14	2	33.3333	6	42.8571	PID_TCR_JNK_PATHWAY	HCC515	TRT_SH.CGS	TRUE	PID_TCR_JNK_PATHWAY:HCC515:trt_sh.cgs	0.9845	1.2761	1.7657	-
PYRUVATE_DEHYDROGENASE_KINASE_INHIBITOR:A549:TRT_CP	MOA_CLASS	5	6	2	40	4	66.6667	PYRUVATE_DEHYDROGENASE_KINASE_INHIBITOR	A549	TRT_CP	TRUE	PYRUVATE_DEHYDROGENASE_KINASE_INHIBITOR:A549:trt_cp	0.903	0.9147	1.5132	-
REACTOME_NRIF_SIGNALS_CELL_DEATH_FROM_THE_NUCLEUS:A549:TRT_SH.CGS	PATHWAY_SET	7	15	5	71.4286	7	46.6667	REACTOME_NRIF_SIGNALS_CELL_DEATH_FROM_THE_NUCLEUS	A549	TRT_SH.CGS	TRUE	REACTOME_NRIF_SIGNALS_CELL_DEATH_FROM_THE_NUCLEUS:A549:trt_sh.cgs	0.9019	1.1539	1.7048	-
REACTOME_TGF_BETA_RECEPTOR_SIGNALING_IN_EMT_EPITHELIAL_TO_MESENCHYMAL_TRANSITION:A549:TRT_SH.CGS	PATHWAY_SET	6	15	3	50	6	40	REACTOME_TGF_BETA_RECEPTOR_SIGNALING_IN_EMT_EPITHELIAL_TO_MESENCHYMAL_TRANSITION	A549	TRT_SH.CGS	TRUE	REACTOME_TGF_BETA_RECEPTOR_SIGNALING_IN_EMT_EPITHELIAL_TO_MESENCHYMAL_TRANSITION:A549:trt_sh.cgs	0.9314	1.1031	1.6705	-
RNA_SYNTHESIS_INHIBITOR:HCC515:TRT_CP	MOA_CLASS	5	9	2	40	3	33.3333	RNA_SYNTHESIS_INHIBITOR	HCC515	TRT_CP	TRUE	RNA_SYNTHESIS_INHIBITOR:HCC515:trt_cp	0.9508	0.9918	1.5931	-
BIOCARTA_DNAFRAGMENT_PATHWAY:HCC515:TRT_SH.CGS	PATHWAY_SET	5	10	3	60	5	50	BIOCARTA_DNAFRAGMENT_PATHWAY	HCC515	TRT_SH.CGS	TRUE	BIOCARTA_DNAFRAGMENT_PATHWAY:HCC515:trt_sh.cgs	0.9445	0.9872	1.5827	35008645
BIOCARTA_VITCB_PATHWAY:HCC515:TRT_SH.CGS	PATHWAY_SET	4	11	3	75	4	36.3636	BIOCARTA_VITCB_PATHWAY	HCC515	TRT_SH.CGS	TRUE	BIOCARTA_VITCB_PATHWAY:HCC515:trt_sh.cgs	0.9523	0.9018	1.503	35008645
CP_IGF_1_INHIBITOR:A549:TRT_CP	PCL	4	3	2	50	3	100	CP_IGF_1_INHIBITOR	A549	TRT_CP	TRUE	CP_IGF_1_INHIBITOR:A549:trt_cp	0.9278	0.8606	1.4643	35008645, 36499305
CP_JAK_INHIBITOR:A549:TRT_CP	PCL	4	5	3	75	3	60	CP_JAK_INHIBITOR	A549	TRT_CP	TRUE	CP_JAK_INHIBITOR:A549:trt_cp	0.9121	0.8382	1.4395	35008645, 35804895
CP_PKC_INHIBITOR:HCC515:TRT_CP	PCL	4	7	4	100	4	57.1429	CP_PKC_INHIBITOR	HCC515	TRT_CP	TRUE	CP_PKC_INHIBITOR:HCC515:trt_cp	0.9065	0.8286	1.4307	35008645
FOCAL_ADHESION_KINASE_INHIBITOR:HCC515:TRT_CP	MOA_CLASS	3	6	2	66.6667	3	50	FOCAL_ADHESION_KINASE_INHIBITOR	HCC515	TRT_CP	TRUE	FOCAL_ADHESION_KINASE_INHIBITOR:HCC515:trt_cp	0.9709	0.7996	1.3996	35008645
INOSITOL_MONOPHOSPHATASE_INHIBITOR:HCC515:TRT_CP	MOA_CLASS	4	6	4	100	4	66.6667	INOSITOL_MONOPHOSPHATASE_INHIBITOR	HCC515	TRT_CP	TRUE	INOSITOL_MONOPHOSPHATASE_INHIBITOR:HCC515:trt_cp	0.9299	0.8655	1.4677	35008645
KD_AHSP_PATHWAY:A549:TRT_SH.CGS	PCL	3	4	3	100	3	75	KD_AHSP_PATHWAY	A549	TRT_SH.CGS	TRUE	KD_AHSP_PATHWAY:A549:trt_sh.cgs	0.9726	0.8023	1.4021	35804895
KD_LYSINE_ACETYLTRANSFERASES:A549:TRT_SH.CGS	PCL	3	3	3	100	3	100	KD_LYSINE_ACETYLTRANSFERASES	A549	TRT_SH.CGS	TRUE	KD_LYSINE_ACETYLTRANSFERASES:A549:trt_sh.cgs	0.9547	0.7703	1.3763	35008645
KD_RIBOSOMAL_40S_SUBUNIT:A549:TRT_SH.CGS	PCL	12	14	11	91.6667	12	85.7143	KD_RIBOSOMAL_40S_SUBUNIT	A549	TRT_SH.CGS	TRUE	KD_RIBOSOMAL_40S_SUBUNIT:A549:trt_sh.cgs	0.9119	2.0508	2.0374	35008645, 35804895
OE_CELL_CYCLE_INHIBITION:A549:TRT_OE	PCL	3	3	2	66.6667	3	100	OE_CELL_CYCLE_INHIBITION	A549	TRT_OE	TRUE	OE_CELL_CYCLE_INHIBITION:A549:trt_oe	0.9825	0.815	1.4163	35804895
OE_INTERLEUKINS:HCC515:TRT_SH.CGS	PCL	3	4	3	100	3	75	OE_INTERLEUKINS	HCC515	TRT_SH.CGS	TRUE	OE_INTERLEUKINS:HCC515:trt_sh.cgs	0.9556	0.7731	1.3776	35008645
PID_RANBP2_PATHWAY:A549:TRT_XPR	PATHWAY_SET	7	11	5	71.4286	4	36.3636	PID_RANBP2_PATHWAY	A549	TRT_XPR	TRUE	PID_RANBP2_PATHWAY:A549:trt_xpr	0.9339	1.2761	1.7652	35008645
PKC_INHIBITOR:HCC515:TRT_CP	MOA_CLASS	10	21	7	70	9	42.8571	PKC_INHIBITOR	HCC515	TRT_CP	TRUE	PKC_INHIBITOR:HCC515:trt_cp	0.9065	1.562	1.9695	35008645
REACTOME_REGULATION_OF_INSULIN_SECRETION_BY_ACETYLCHOLINE:HCC515:TRT_SH.CGS	PATHWAY_SET	4	10	4	100	4	40	REACTOME_REGULATION_OF_INSULIN_SECRETION_BY_ACETYLCHOLINE	HCC515	TRT_SH.CGS	TRUE	REACTOME_REGULATION_OF_INSULIN_SECRETION_BY_ACETYLCHOLINE:HCC515:trt_sh.cgs	0.911	0.8362	1.4378	35008645
REACTOME_SIGNAL_ATTENUATION:HCC515:TRT_SH.CGS	PATHWAY_SET	4	13	2	50	4	30.7692	REACTOME_SIGNAL_ATTENUATION	HCC515	TRT_SH.CGS	TRUE	REACTOME_SIGNAL_ATTENUATION:HCC515:trt_sh.cgs	0.9391	0.8715	1.4821	35008645
REACTOME_SPRY_REGULATION_OF_FGF_SIGNALING:A549:TRT_SH.CGS	PATHWAY_SET	6	14	4	66.6667	6	42.8571	REACTOME_SPRY_REGULATION_OF_FGF_SIGNALING	A549	TRT_SH.CGS	TRUE	REACTOME_SPRY_REGULATION_OF_FGF_SIGNALING:A549:trt_sh.cgs	0.9205	1.0808	1.651	35008645
T-TYPE_CALCIUM_CHANNEL_BLOCKER:HCC515:TRT_CP	MOA_CLASS	4	6	3	75	3	50	T-TYPE_CALCIUM_CHANNEL_BLOCKER	HCC515	TRT_CP	TRUE	T-TYPE_CALCIUM_CHANNEL_BLOCKER:HCC515:trt_cp	0.9921	0.968	1.5659	35008645

## Sheet: List2 NSCLC Significant Outputs
id	set_type	set_size	src_set_size	num_hiq_sig	pct_hiq_sig	num_uniq_pert	pct_src_pert	src_set_id	cell_iname	pert_type	is_filtered_set	desc	raw_cs	fdr_q_nlog10	norm_cs	Previously published (PMID)
CP_FLT3_INHIBITOR:HCC515:TRT_CP	PCL	8	6	6	75	6	100	CP_FLT3_INHIBITOR	HCC515	TRT_CP	TRUE	CP_FLT3_INHIBITOR:HCC515:trt_cp	0.9046	1.5534	1.8618	-
CP_IKK_INHIBITOR:A549:TRT_CP	PCL	5	5	4	80	4	80	CP_IKK_INHIBITOR	A549	TRT_CP	TRUE	CP_IKK_INHIBITOR:A549:trt_cp	0.9899	1.3245	1.7373	-
KD_CANONICAL_HIGH_MOBILITY_GROUP_PROTEINS:HCC515:TRT_SH.CGS	PCL	3	3	2	66.6667	3	100	KD_CANONICAL_HIGH_MOBILITY_GROUP_PROTEINS	HCC515	TRT_SH.CGS	TRUE	KD_CANONICAL_HIGH_MOBILITY_GROUP_PROTEINS:HCC515:trt_sh.cgs	0.9272	0.8587	1.3975	-
PYRUVATE_DEHYDROGENASE_KINASE_INHIBITOR:A549:TRT_CP	MOA_CLASS	5	6	2	40	4	66.6667	PYRUVATE_DEHYDROGENASE_KINASE_INHIBITOR	A549	TRT_CP	TRUE	PYRUVATE_DEHYDROGENASE_KINASE_INHIBITOR:A549:trt_cp	0.9081	1.0716	1.5939	-
REACTOME_NRIF_SIGNALS_CELL_DEATH_FROM_THE_NUCLEUS:A549:TRT_SH.CGS	PATHWAY_SET	7	15	5	71.4286	7	46.6667	REACTOME_NRIF_SIGNALS_CELL_DEATH_FROM_THE_NUCLEUS	A549	TRT_SH.CGS	TRUE	REACTOME_NRIF_SIGNALS_CELL_DEATH_FROM_THE_NUCLEUS:A549:trt_sh.cgs	0.9371	1.5534	1.8659	-
REACTOME_REGULATION_OF_THE_FANCONI_ANEMIA_PATHWAY:A549:TRT_SH.CGS	PATHWAY_SET	3	8	2	66.6667	3	37.5	REACTOME_REGULATION_OF_THE_FANCONI_ANEMIA_PATHWAY	A549	TRT_SH.CGS	TRUE	REACTOME_REGULATION_OF_THE_FANCONI_ANEMIA_PATHWAY:A549:trt_sh.cgs	0.9358	0.8711	1.4104	-
REACTOME_TGF_BETA_RECEPTOR_SIGNALING_IN_EMT_EPITHELIAL_TO_MESENCHYMAL_TRANSITION:A549:TRT_SH.CGS	PATHWAY_SET	6	15	3	50	6	40	REACTOME_TGF_BETA_RECEPTOR_SIGNALING_IN_EMT_EPITHELIAL_TO_MESENCHYMAL_TRANSITION	A549	TRT_SH.CGS	TRUE	REACTOME_TGF_BETA_RECEPTOR_SIGNALING_IN_EMT_EPITHELIAL_TO_MESENCHYMAL_TRANSITION:A549:trt_sh.cgs	0.9423	1.3566	1.7739	-
BIOCARTA_GLYCOLYSIS_PATHWAY:A549:TRT_SH.CGS	PATHWAY_SET	6	10	2	33.3333	6	60	BIOCARTA_GLYCOLYSIS_PATHWAY	A549	TRT_SH.CGS	TRUE	BIOCARTA_GLYCOLYSIS_PATHWAY:A549:trt_sh.cgs	0.9118	1.3009	1.7166	35008645
BRUTON'S_TYROSINE_KINASE_(BTK)_INHIBITOR:A549:TRT_CP	MOA_CLASS	4	8	3	75	4	50	BRUTON'S_TYROSINE_KINASE_(BTK)_INHIBITOR	A549	TRT_CP	TRUE	BRUTON'S_TYROSINE_KINASE_(BTK)_INHIBITOR:A549:trt_cp	0.9938	1.145	1.6325	35008645
CP_JAK_INHIBITOR:HCC515:TRT_CP	PCL	3	5	3	100	3	60	CP_JAK_INHIBITOR	HCC515	TRT_CP	TRUE	CP_JAK_INHIBITOR:HCC515:trt_cp	0.9485	0.8911	1.4295	35008645, 35804895
CP_JAK_INHIBITOR:A549:TRT_CP	PCL	4	5	3	75	3	60	CP_JAK_INHIBITOR	A549	TRT_CP	TRUE	CP_JAK_INHIBITOR:A549:trt_cp	0.9229	0.9651	1.516	35008645, 35804895
KD_AHSP_PATHWAY:A549:TRT_SH.CGS	PCL	3	4	3	100	3	75	KD_AHSP_PATHWAY	A549	TRT_SH.CGS	TRUE	KD_AHSP_PATHWAY:A549:trt_sh.cgs	0.9718	0.9232	1.4646	35804895
KD_LYSINE_ACETYLTRANSFERASES:A549:TRT_SH.CGS	PCL	3	3	3	100	3	100	KD_LYSINE_ACETYLTRANSFERASES	A549	TRT_SH.CGS	TRUE	KD_LYSINE_ACETYLTRANSFERASES:A549:trt_sh.cgs	0.98	0.9325	1.4771	35008645
LAXATIVE:A549:TRT_CP	MOA_CLASS	3	5	2	66.6667	3	60	LAXATIVE	A549	TRT_CP	TRUE	LAXATIVE:A549:trt_cp	0.9024	0.8139	1.3601	35008645
OE_CELL_CYCLE_INHIBITION:A549:TRT_OE	PCL	3	3	2	66.6667	3	100	OE_CELL_CYCLE_INHIBITION	A549	TRT_OE	TRUE	OE_CELL_CYCLE_INHIBITION:A549:trt_oe	0.9927	0.9536	1.4963	35804895
REACTOME_DOWNREGULATION_OF_ERBB2_ERBB3_SIGNALING:A549:TRT_SH.CGS	PATHWAY_SET	4	12	3	75	4	33.3333	REACTOME_DOWNREGULATION_OF_ERBB2_ERBB3_SIGNALING	A549	TRT_SH.CGS	TRUE	REACTOME_DOWNREGULATION_OF_ERBB2_ERBB3_SIGNALING:A549:trt_sh.cgs	0.9514	1.0283	1.5628	35008645
REACTOME_GLYCOLYSIS:A549:TRT_SH.CGS	PATHWAY_SET	9	29	4	44.4444	9	31.0345	REACTOME_GLYCOLYSIS	A549	TRT_SH.CGS	TRUE	REACTOME_GLYCOLYSIS:A549:trt_sh.cgs	0.9118	1.633	1.9265	35008645
REACTOME_SPRY_REGULATION_OF_FGF_SIGNALING:A549:TRT_SH.CGS	PATHWAY_SET	6	14	4	66.6667	6	42.8571	REACTOME_SPRY_REGULATION_OF_FGF_SIGNALING	A549	TRT_SH.CGS	TRUE	REACTOME_SPRY_REGULATION_OF_FGF_SIGNALING:A549:trt_sh.cgs	0.9285	1.3245	1.7479	35008645
T-TYPE_CALCIUM_CHANNEL_BLOCKER:HCC515:TRT_CP	MOA_CLASS	4	6	3	75	3	50	T-TYPE_CALCIUM_CHANNEL_BLOCKER	HCC515	TRT_CP	TRUE	T-TYPE_CALCIUM_CHANNEL_BLOCKER:HCC515:trt_cp	0.989	1.135	1.6245	35008645

## Sheet: Common Outputs
src_set_id	cell_iname	pert_type
CP_IKK_INHIBITOR	A549	TRT_CP
CP_JAK_INHIBITOR	A549	TRT_CP
KD_AHSP_PATHWAY	A549	TRT_SH.CGS
KD_CANONICAL_HIGH_MOBILITY_GROUP_PROTEINS	HCC515	TRT_SH.CGS
KD_LYSINE_ACETYLTRANSFERASES	A549	TRT_SH.CGS
OE_CELL_CYCLE_INHIBITION	A549	TRT_OE
PYRUVATE_DEHYDROGENASE_KINASE_INHIBITOR	A549	TRT_CP
REACTOME_NRIF_SIGNALS_CELL_DEATH_FROM_THE_NUCLEUS	A549	TRT_SH.CGS
REACTOME_SPRY_REGULATION_OF_FGF_SIGNALING	A549	TRT_SH.CGS
REACTOME_TGF_BETA_RECEPTOR_SIGNALING_IN_EMT_EPITHELIAL_TO_MESENCHYMAL_TRANSITION	A549	TRT_SH.CGS
T-TYPE_CALCIUM_CHANNEL_BLOCKER	HCC515	TRT_CP
