# Supplementary material for: MicroRNA, mRNA, and Proteomics Biomarkers and Therapeutic Targets for Improving Lung Cancer Treatment Outcomes
Source: Cancers (Basel). 2023 Apr 14;15(8):2294. doi: 10.3390/cancers15082294 (PMC10137184; doi:10.3390/cancers15082294)
Supplement: Supplementary file 1 [file cancers-15-02294-s001.zip › S8. Drug response gene fusions and mutations in human NSCLC cell lines.xlsx]

## Sheet: mutation
Gene	drugName	geneCategory	DepMap_ID	Gene_mutation_in_cell_line	Entrez_Gene_Id	NCBI_Build	Chromosome	Start_position	End_position	Strand	Variant_Classification	Variant_Type	Reference_Allele	Alternate_Allele
MCM9	BX-912	Sensitive	ACH-002089	201T	254394	37	6	119238847	119238847	+	Missense_Mutation	SNP	T	C
CNST	BX-912	Sensitive	ACH-000757	A427	163882	37	1	246823519	246823519	+	Silent	SNP	T	C
PTPRG	BX-912	Sensitive	ACH-000528	ABC1	5793	37	3	62153767	62153767	+	Silent	SNP	C	T
CDK6	BX-912	Sensitive	ACH-000511	CALU1	1021	37	7	92462614	92462614	+	Silent	SNP	G	C
RPTOR	BX-912	Sensitive	ACH-000392	CALU3	57521	37	17	78934006	78934006	+	Splice_Site	SNP	G	T
STAU1	BX-912	Sensitive	ACH-000392	CALU3	6780	37	20	47752379	47752379	+	Silent	SNP	C	A
NCOR2	BX-912	Sensitive	ACH-000264	CALU6	9612	37	12	124826480	124826480	+	Missense_Mutation	SNP	G	T
TGFB2	BX-912	Sensitive	ACH-000662	CORL23	7042	37	1	218578618	218578618	+	Missense_Mutation	SNP	T	A
CNST	BX-912	Sensitive	ACH-000925	DV90	163882	37	1	246755188	246755188	+	Silent	SNP	T	A
NCOR2	BX-912	Sensitive	ACH-000925	DV90	9612	37	12	124840076	124840076	+	Missense_Mutation	SNP	C	T
RPTOR	BX-912	Sensitive	ACH-000925	DV90	57521	37	17	78936854	78936854	+	Silent	SNP	C	T
RPTOR	BX-912	Sensitive	ACH-000925	DV90	57521	37	17	78882671	78882671	+	Missense_Mutation	SNP	A	G
RPTOR	BX-912	Sensitive	ACH-000925	DV90	57521	37	17	78936354	78936354	+	Frame_Shift_Del	DEL	C	-
NCOR2	BX-912	Sensitive	ACH-000706	EKVX	9612	37	12	124832793	124832793	+	Silent	SNP	C	T
NEGR1	BX-912	Sensitive	ACH-000585	EPLC272H	257194	37	1	72748019	72748019	+	Silent	SNP	C	A
RRBP1	BX-912	Sensitive	ACH-000585	EPLC272H	6238	37	20	17623639	17623639	+	Missense_Mutation	SNP	C	G
NEGR1	BX-912	Sensitive	ACH-000843	HARA	257194	37	1	71873226	71873226	+	Missense_Mutation	SNP	G	T
TGFB2	BX-912	Sensitive	ACH-000843	HARA	7042	37	1	218614653	218614653	+	Silent	SNP	C	G
RAB32	BX-912	Sensitive	ACH-000578	HCC1171	10981	37	6	146875619	146875619	+	Missense_Mutation	SNP	C	T
ATG4C	BX-912	Sensitive	ACH-000901	HCC1359	84938	37	1	63284942	63284942	+	Nonsense_Mutation	SNP	G	T
ATG4C	BX-912	Sensitive	ACH-000901	HCC1359	84938	37	1	63284941	63284941	+	Silent	SNP	T	C
SOGA3	BX-912	Sensitive	ACH-000901	HCC1359	387104	37	6	127837218	127837218	+	Missense_Mutation	SNP	C	A
KDM6B	BX-912	Sensitive	ACH-000891	HCC1438	23135	37	17	7755049	7755049	+	Missense_Mutation	SNP	G	T
NCOR2	BX-912	Sensitive	ACH-000891	HCC1438	9612	37	12	124825243	124825243	+	Missense_Mutation	SNP	G	A
BCAS1	BX-912	Resistant	ACH-000878	HCC15	8537	37	20	52645340	52645340	+	Missense_Mutation	SNP	C	A
CNST	BX-912	Sensitive	ACH-000878	HCC15	163882	37	1	246797312	246797312	+	Splice_Site	SNP	G	C
NEGR1	BX-912	Sensitive	ACH-000878	HCC15	257194	37	1	72748163	72748163	+	Silent	SNP	C	A
ATG4C	BX-912	Sensitive	ACH-000314	HCC2108	84938	37	1	63282435	63282435	+	Missense_Mutation	SNP	A	T
MCM9	BX-912	Sensitive	ACH-000314	HCC2108	254394	37	6	119147444	119147444	+	Silent	SNP	C	G
NCOR2	BX-912	Sensitive	ACH-000975	HCC2450	9612	37	12	124819806	124819806	+	Missense_Mutation	SNP	C	G
TMCC2	BX-912	Sensitive	ACH-000150	HCC2935	9911	37	1	205238488	205238488	+	Silent	SNP	C	T
TGFB2	BX-912	Sensitive	ACH-000575	HCC364	7042	37	1	218520187	218520187	+	Silent	SNP	G	A
PTPRG	BX-912	Sensitive	ACH-000840	HCC366	5793	37	3	62153674	62153674	+	Silent	SNP	G	T
RPTOR	BX-912	Sensitive	ACH-000840	HCC366	57521	37	17	78897413	78897413	+	Silent	SNP	C	T
TMCC2	BX-912	Sensitive	ACH-000840	HCC366	9911	37	1	205210970	205210970	+	Missense_Mutation	SNP	G	T
ARSD	BX-912	Sensitive	ACH-000066	HCC4006	414	37	X	2833668	2833668	+	Missense_Mutation	SNP	G	A
SOGA3	BX-912	Sensitive	ACH-000667	HCC44	387104	37	6	127837596	127837596	+	Missense_Mutation	SNP	G	C
NEGR1	BX-912	Sensitive	ACH-000339	HCC461	257194	37	1	72058563	72058563	+	Missense_Mutation	SNP	C	A
PTPRG	BX-912	Sensitive	ACH-000339	HCC461	5793	37	3	61989104	61989104	+	Missense_Mutation	SNP	A	G
NEGR1	BX-912	Sensitive	ACH-000872	HCC515	257194	37	1	72076774	72076774	+	Silent	SNP	G	T
STAU1	BX-912	Sensitive	ACH-000861	HOP62	6780	37	20	47741008	47741008	+	Silent	SNP	G	A
PTPRG	BX-912	Sensitive	ACH-000825	HOP92	5793	37	3	62189096	62189096	+	Missense_Mutation	SNP	T	G
SOGA3	BX-912	Sensitive	ACH-000672	IALM	387104	37	6	127796456	127796456	+	Silent	SNP	C	T
CNST	BX-912	Sensitive	ACH-000858	KNS62	163882	37	1	246755116	246755116	+	Silent	SNP	T	A
BCAS1	BX-912	Resistant	ACH-000705	LC1F	8537	37	20	52612504	52612504	+	Missense_Mutation	SNP	G	C
BCAS1	BX-912	Resistant	ACH-002156	LC1SQ	8537	37	20	52612504	52612504	+	Missense_Mutation	SNP	G	C
TMCC2	BX-912	Sensitive	ACH-002156	LC1SQ	9911	37	1	205238705	205238705	+	Silent	SNP	C	A
BCAS1	BX-912	Resistant	ACH-001113	LC1SQSF	8537	37	20	52612504	52612504	+	Missense_Mutation	SNP	G	C
TMCC2	BX-912	Sensitive	ACH-001113	LC1SQSF	9911	37	1	205238705	205238705	+	Silent	SNP	C	A
SOGA3	BX-912	Sensitive	ACH-002157	LC2AD	387104	37	6	127796477	127796477	+	Silent	SNP	C	G
SOGA3	BX-912	Sensitive	ACH-000596	LCLC97TM1	387104	37	6	127796980	127796980	+	Missense_Mutation	SNP	A	T
SOGA3	BX-912	Sensitive	ACH-000444	LU99	387104	37	6	127837354	127837354	+	Missense_Mutation	SNP	C	A
RRBP1	BX-912	Sensitive	ACH-000390	LUDLU1	6238	37	20	17623729	17623729	+	Silent	SNP	C	A
BCAS1	BX-912	Resistant	ACH-000787	LXF289	8537	37	20	52570007	52570007	+	Missense_Mutation	SNP	C	A
RRBP1	BX-912	Sensitive	ACH-000787	LXF289	6238	37	20	17640270	17640270	+	Missense_Mutation	SNP	C	A
SOGA3	BX-912	Sensitive	ACH-000787	LXF289	387104	37	6	127797326	127797326	+	Silent	SNP	C	G
CGNL1	BX-912	Resistant	ACH-000851	MORCPR	84952	37	15	57809146	57809146	+	Missense_Mutation	SNP	G	A
NCOR2	BX-912	Sensitive	ACH-000851	MORCPR	9612	37	12	124846729	124846729	+	Missense_Mutation	SNP	G	A
BCAS1	BX-912	Resistant	ACH-000980	NCIH1155	8537	37	20	52644939	52644939	+	Missense_Mutation	SNP	C	T
CD14	BX-912	Resistant	ACH-000980	NCIH1155	929	37	5	140012004	140012004	+	Nonsense_Mutation	SNP	G	A
GSTA5	BX-912	Sensitive	ACH-000980	NCIH1155	221357	37	6	52696742	52696742	+	Silent	SNP	C	T
KDM6B	BX-912	Sensitive	ACH-000980	NCIH1155	23135	37	17	7750469	7750469	+	Missense_Mutation	SNP	C	T
PTPRG	BX-912	Sensitive	ACH-000980	NCIH1155	5793	37	3	62278939	62278939	+	Missense_Mutation	SNP	C	T
CD44	BX-912	Sensitive	ACH-000510	NCIH1299	960	37	11	35236423	35236424	+	Frame_Shift_Ins	INS	-	T
RPTOR	BX-912	Sensitive	ACH-000845	NCIH1373	57521	37	17	78704404	78704404	+	Silent	SNP	G	A
RPTOR	BX-912	Sensitive	ACH-000845	NCIH1373	57521	37	17	78931459	78931476	+	In_Frame_Del	DEL	GGCCTCCTCATGAGCTCA	-
NCOR2	BX-912	Sensitive	ACH-000737	NCIH1385	9612	37	12	124839427	124839427	+	Missense_Mutation	SNP	G	C
RRBP1	BX-912	Sensitive	ACH-000737	NCIH1385	6238	37	20	17640257	17640257	+	Missense_Mutation	SNP	G	A
TMCC2	BX-912	Sensitive	ACH-000589	NCIH1437	9911	37	1	205238191	205238191	+	Silent	SNP	C	T
NCOR2	BX-912	Sensitive	ACH-000892	NCIH1563	9612	37	12	124829269	124829269	+	Missense_Mutation	SNP	C	A
SOGA3	BX-912	Sensitive	ACH-000869	NCIH1568	387104	37	6	127837081	127837081	+	Missense_Mutation	SNP	G	C
CGNL1	BX-912	Resistant	ACH-000916	NCIH1573	84952	37	15	57835968	57835968	+	Silent	SNP	G	T
NCOR2	BX-912	Sensitive	ACH-000916	NCIH1573	9612	37	12	124856846	124856846	+	Missense_Mutation	SNP	C	G
NCOR2	BX-912	Sensitive	ACH-000916	NCIH1573	9612	37	12	124839416	124839416	+	Missense_Mutation	SNP	C	G
CNST	BX-912	Sensitive	ACH-000921	NCIH157DM	163882	37	1	246810629	246810629	+	Nonsense_Mutation	SNP	C	T
PTPRG	BX-912	Sensitive	ACH-000921	NCIH157DM	5793	37	3	61975307	61975307	+	Frame_Shift_Del	DEL	G	-
PTPRG	BX-912	Sensitive	ACH-000921	NCIH157DM	5793	37	3	61989031	61989031	+	Missense_Mutation	SNP	C	T
RPTOR	BX-912	Sensitive	ACH-000921	NCIH157DM	57521	37	17	78923316	78923316	+	Missense_Mutation	SNP	G	T
RRBP1	BX-912	Sensitive	ACH-000921	NCIH157DM	6238	37	20	17640156	17640156	+	Missense_Mutation	SNP	C	T
TGFB2	BX-912	Sensitive	ACH-000921	NCIH157DM	7042	37	1	218607747	218607747	+	Nonsense_Mutation	SNP	C	A
RRBP1	BX-912	Sensitive	ACH-000015	NCIH1581	6238	37	20	17640107	17640107	+	Missense_Mutation	SNP	C	T
CGNL1	BX-912	Resistant	ACH-000744	NCIH1623	84952	37	15	57809035	57809035	+	Missense_Mutation	SNP	G	C
BCAS1	BX-912	Resistant	ACH-000766	NCIH1648	8537	37	20	52574016	52574016	+	Silent	SNP	C	A
NCOR2	BX-912	Sensitive	ACH-000035	NCIH1650	9612	37	12	124829443	124829443	+	Missense_Mutation	SNP	C	T
CGNL1	BX-912	Resistant	ACH-000893	NCIH1651	84952	37	15	57731071	57731071	+	Missense_Mutation	SNP	C	G
MCM9	BX-912	Sensitive	ACH-000893	NCIH1651	254394	37	6	119136174	119136174	+	Missense_Mutation	SNP	C	T
CDK6	BX-912	Sensitive	ACH-000448	NCIH1666	1021	37	7	92355060	92355060	+	Missense_Mutation	SNP	G	C
KDM6B	BX-912	Sensitive	ACH-000021	NCIH1693	23135	37	17	7752653	7752653	+	Missense_Mutation	SNP	G	A
KDM6B	BX-912	Sensitive	ACH-001362	NCIH1770	23135	37	17	7751814	7751814	+	Silent	SNP	C	T
CNST	BX-912	Sensitive	ACH-000888	NCIH1793	163882	37	1	246810567	246810567	+	Missense_Mutation	SNP	C	T
LGMN	BX-912	Sensitive	ACH-000888	NCIH1793	5641	37	14	93178193	93178193	+	Missense_Mutation	SNP	C	T
KDM6B	BX-912	Sensitive	ACH-000033	NCIH1819	23135	37	17	7752653	7752653	+	Missense_Mutation	SNP	G	A
BCAS1	BX-912	Resistant	ACH-000894	NCIH1869	8537	37	20	52570069	52570069	+	Nonsense_Mutation	SNP	G	A
NPC2	BX-912	Sensitive	ACH-000434	NCIH1915	10577	37	14	74951146	74951148	+	In_Frame_Del	DEL	TTA	-
NEGR1	BX-912	Sensitive	ACH-001137	NCIH1993	257194	37	1	72241942	72241942	+	Missense_Mutation	SNP	C	A
CGNL1	BX-912	Resistant	ACH-000886	NCIH2009	84952	37	15	57835954	57835954	+	Missense_Mutation	SNP	G	A
STAU1	BX-912	Sensitive	ACH-000886	NCIH2009	6780	37	20	47782692	47782692	+	Nonsense_Mutation	SNP	G	C
ATG4C	BX-912	Sensitive	ACH-000781	NCIH2023	84938	37	1	63299731	63299731	+	Frame_Shift_Del	DEL	G	-
RRBP1	BX-912	Sensitive	ACH-000781	NCIH2023	6238	37	20	17639599	17639599	+	Missense_Mutation	SNP	C	G
NCOR2	BX-912	Sensitive	ACH-000521	NCIH2030	9612	37	12	124829202	124829202	+	Frame_Shift_Del	DEL	C	-
NCOR2	BX-912	Sensitive	ACH-000590	NCIH2073	9612	37	12	124825216	124825216	+	Missense_Mutation	SNP	C	A
NEGR1	BX-912	Sensitive	ACH-000590	NCIH2073	257194	37	1	72241942	72241942	+	Missense_Mutation	SNP	C	A
SOGA3	BX-912	Sensitive	ACH-000841	NCIH2087	387104	37	6	127796911	127796911	+	Missense_Mutation	SNP	C	T
KDM6B	BX-912	Sensitive	ACH-000904	NCIH2106	23135	37	17	7751814	7751814	+	Silent	SNP	C	T
MCM9	BX-912	Sensitive	ACH-000904	NCIH2106	254394	37	6	119137407	119137407	+	Missense_Mutation	SNP	T	A
NCOR2	BX-912	Sensitive	ACH-000904	NCIH2106	9612	37	12	124957503	124957503	+	Missense_Mutation	SNP	T	G
NCOR2	BX-912	Sensitive	ACH-000929	NCIH2110	9612	37	12	124835278	124835278	+	Silent	SNP	C	A
CGNL1	BX-912	Resistant	ACH-000785	NCIH2126	84952	37	15	57820853	57820853	+	Splice_Site	SNP	T	C
NCOR2	BX-912	Sensitive	ACH-000785	NCIH2126	9612	37	12	124922500	124922500	+	Silent	SNP	C	T
TMCC2	BX-912	Sensitive	ACH-000785	NCIH2126	9911	37	1	205238950	205238950	+	Silent	SNP	G	A
CGNL1	BX-912	Resistant	ACH-001363	NCIH2135	84952	37	15	57730212	57730212	+	Silent	SNP	C	T
CNST	BX-912	Sensitive	ACH-000924	NCIH2172	163882	37	1	246823521	246823521	+	Missense_Mutation	SNP	G	T
G3BP2	BX-912	Sensitive	ACH-000924	NCIH2172	9908	37	4	76582147	76582147	+	Frame_Shift_Del	DEL	C	-
NCOR2	BX-912	Sensitive	ACH-000924	NCIH2172	9612	37	12	124831217	124831217	+	Missense_Mutation	SNP	C	A
SOGA3	BX-912	Sensitive	ACH-000447	NCIH2228	387104	37	6	127797026	127797026	+	Silent	SNP	G	A
NCOR2	BX-912	Sensitive	ACH-000367	NCIH226	9612	37	12	124809960	124809960	+	Silent	SNP	G	A
CNST	BX-912	Sensitive	ACH-000718	NCIH2291	163882	37	1	246810570	246810570	+	Missense_Mutation	SNP	G	C
CD14	BX-912	Resistant	ACH-000951	NCIH2342	929	37	5	140011688	140011688	+	Missense_Mutation	SNP	C	T
NEGR1	BX-912	Sensitive	ACH-000951	NCIH2342	257194	37	1	72058594	72058594	+	Frame_Shift_Del	DEL	G	-
RPTOR	BX-912	Sensitive	ACH-000951	NCIH2342	57521	37	17	78882721	78882721	+	Missense_Mutation	SNP	G	T
CNST	BX-912	Sensitive	ACH-000875	NCIH2347	163882	37	1	246811307	246811307	+	Missense_Mutation	SNP	G	A
NCOR2	BX-912	Sensitive	ACH-000875	NCIH2347	9612	37	12	124825162	124825162	+	Missense_Mutation	SNP	G	T
G3BP2	BX-912	Sensitive	ACH-000337	NCIH3122	9908	37	4	76570632	76570632	+	Silent	SNP	G	A
NCOR2	BX-912	Sensitive	ACH-000837	NCIH322	9612	37	12	124856717	124856717	+	Silent	SNP	C	A
NCOR2	BX-912	Sensitive	ACH-000860	NCIH358	9612	37	12	124856982	124856982	+	Missense_Mutation	SNP	G	A
RPTOR	BX-912	Sensitive	ACH-000860	NCIH358	57521	37	17	78919466	78919466	+	Splice_Site	SNP	G	T
RPTOR	BX-912	Sensitive	ACH-000860	NCIH358	57521	37	17	78796907	78796907	+	Missense_Mutation	SNP	C	G
TMCC2	BX-912	Sensitive	ACH-000860	NCIH358	9911	37	1	205238527	205238527	+	Silent	SNP	G	T
GSTA5	BX-912	Sensitive	ACH-000638	NCIH441	221357	37	6	52696655	52696655	+	Missense_Mutation	SNP	G	C
NEGR1	BX-912	Sensitive	ACH-000638	NCIH441	257194	37	1	72400951	72400951	+	Missense_Mutation	SNP	G	A
RPTOR	BX-912	Sensitive	ACH-000463	NCIH460	57521	37	17	78829302	78829302	+	Missense_Mutation	SNP	C	A
NCOR2	BX-912	Sensitive	ACH-000395	NCIH520	9612	37	12	124957557	124957557	+	Missense_Mutation	SNP	G	A
MCM9	BX-912	Sensitive	ACH-000343	NCIH522	254394	37	6	119252861	119252861	+	Missense_Mutation	SNP	C	G
RRBP1	BX-912	Sensitive	ACH-000378	NCIH647	6238	37	20	17639627	17639627	+	Missense_Mutation	SNP	C	G
KDM6B	BX-912	Sensitive	ACH-000945	NCIH650	23135	37	17	7750653	7750653	+	Silent	SNP	C	A
NCOR2	BX-912	Sensitive	ACH-000945	NCIH650	9612	37	12	124817735	124817735	+	Silent	SNP	C	G
NCOR2	BX-912	Sensitive	ACH-000945	NCIH650	9612	37	12	124819042	124819042	+	Missense_Mutation	SNP	C	A
BCAS1	BX-912	Resistant	ACH-000853	NCIH661	8537	37	20	52645504	52645504	+	Missense_Mutation	SNP	C	A
CGNL1	BX-912	Resistant	ACH-000853	NCIH661	84952	37	15	57730586	57730586	+	Missense_Mutation	SNP	T	C
STAU1	BX-912	Sensitive	ACH-000853	NCIH661	6780	37	20	47741115	47741115	+	Missense_Mutation	SNP	C	T
CNST	BX-912	Sensitive	ACH-000416	NCIH838	163882	37	1	246811181	246811181	+	Missense_Mutation	SNP	G	A
ATG4C	BX-912	Sensitive	ACH-000030	PC14	84938	37	1	63329765	63329766	+	Frame_Shift_Ins	INS	-	T
BCAS1	BX-912	Resistant	ACH-000791	RERFLCAD1	8537	37	20	52612504	52612504	+	Missense_Mutation	SNP	G	C
NCOR2	BX-912	Sensitive	ACH-000791	RERFLCAD1	9612	37	12	124819103	124819103	+	Missense_Mutation	SNP	C	A
CGNL1	BX-912	Resistant	ACH-000774	RERFLCAD2	84952	37	15	57731474	57731474	+	Missense_Mutation	SNP	C	T
LGMN	BX-912	Sensitive	ACH-000482	RERFLCKJ	5641	37	14	93185191	93185191	+	Splice_Site	SNP	T	A
NCOR2	BX-912	Sensitive	ACH-000482	RERFLCKJ	9612	37	12	124821521	124821521	+	Missense_Mutation	SNP	C	T
RRBP1	BX-912	Sensitive	ACH-000062	RERFLCMS	6238	37	20	17639930	17639930	+	Missense_Mutation	SNP	T	A
CNST	BX-912	Sensitive	ACH-000553	SQ1	163882	37	1	246829098	246829098	+	Missense_Mutation	SNP	G	T
PTPRG	BX-912	Sensitive	ACH-000669	SW900	5793	37	3	62142838	62142838	+	Silent	SNP	G	T
PTPRG	BX-912	Sensitive	ACH-000669	SW900	5793	37	3	62189287	62189287	+	Silent	SNP	G	A
TMCC2	BX-912	Sensitive	ACH-000813	T3M10	9911	37	1	205210960	205210960	+	Missense_Mutation	SNP	A	G
CGNL1	BX-912	Resistant	ACH-001233	VMRCLCD	84952	37	15	57838365	57838365	+	Missense_Mutation	SNP	G	T
BCOR	daunorubicin	Sensitive	ACH-000757	A427	54880	37	X	39923113	39923113	+	Missense_Mutation	SNP	C	T
OTUD4	daunorubicin	Sensitive	ACH-000392	CALU3	54726	37	4	146067556	146067556	+	Missense_Mutation	SNP	C	T
KMT2B	daunorubicin	Sensitive	ACH-000867	CHAGOK1	9757	37	19	36212077	36212077	+	Missense_Mutation	SNP	C	T
KMT2B	daunorubicin	Sensitive	ACH-000925	DV90	9757	37	19	36216153	36216153	+	Frame_Shift_Del	DEL	G	-
KMT2B	daunorubicin	Sensitive	ACH-000925	DV90	9757	37	19	36214821	36214821	+	Nonsense_Mutation	SNP	C	T
KMT2B	daunorubicin	Sensitive	ACH-000925	DV90	9757	37	19	36210440	36210440	+	Nonsense_Mutation	SNP	C	T
OTUD4	daunorubicin	Sensitive	ACH-000975	HCC2450	54726	37	4	146065575	146065575	+	Silent	SNP	G	A
SMS	daunorubicin	Sensitive	ACH-000975	HCC2450	6611	37	X	22010826	22010826	+	Missense_Mutation	SNP	G	A
OTUD4	daunorubicin	Sensitive	ACH-000575	HCC364	54726	37	4	146083801	146083801	+	Missense_Mutation	SNP	T	C
KMT2B	daunorubicin	Sensitive	ACH-000861	HOP62	9757	37	19	36219693	36219693	+	Silent	SNP	G	A
BCOR	daunorubicin	Sensitive	ACH-000825	HOP92	54880	37	X	39932310	39932310	+	Silent	SNP	C	A
KMT2B	daunorubicin	Sensitive	ACH-000672	IALM	9757	37	19	36223958	36223958	+	Missense_Mutation	SNP	C	A
SYT7	daunorubicin	Sensitive	ACH-000858	KNS62	9066	37	11	61323646	61323646	+	Missense_Mutation	SNP	G	T
KMT2B	daunorubicin	Sensitive	ACH-002156	LC1SQ	9757	37	19	36211143	36211143	+	Silent	SNP	T	G
KMT2B	daunorubicin	Sensitive	ACH-000627	LCLC103H	9757	37	19	36212215	36212215	+	Missense_Mutation	SNP	G	A
KMT2B	daunorubicin	Sensitive	ACH-000444	LU99	9757	37	19	36213574	36213574	+	Silent	SNP	C	A
KMT2B	daunorubicin	Sensitive	ACH-000851	MORCPR	9757	37	19	36211770	36211770	+	Silent	SNP	G	A
SYT7	daunorubicin	Sensitive	ACH-000851	MORCPR	9066	37	11	61286170	61286170	+	Missense_Mutation	SNP	C	A
BCOR	daunorubicin	Sensitive	ACH-000666	NCIH1355	54880	37	X	39934222	39934222	+	Missense_Mutation	SNP	G	A
KMT2B	daunorubicin	Sensitive	ACH-000852	NCIH1435	9757	37	19	36214737	36214737	+	Missense_Mutation	SNP	C	T
BCOR	daunorubicin	Sensitive	ACH-000892	NCIH1563	54880	37	X	39923005	39923005	+	Nonsense_Mutation	SNP	T	A
KMT2B	daunorubicin	Sensitive	ACH-000916	NCIH1573	9757	37	19	36214752	36214752	+	Missense_Mutation	SNP	G	T
KMT2B	daunorubicin	Sensitive	ACH-000744	NCIH1623	9757	37	19	36223714	36223714	+	Silent	SNP	A	T
OTUD4	daunorubicin	Sensitive	ACH-000744	NCIH1623	54726	37	4	146077135	146077135	+	Frame_Shift_Del	DEL	C	-
KMT2B	daunorubicin	Sensitive	ACH-000035	NCIH1650	9757	37	19	36224232	36224232	+	Missense_Mutation	SNP	C	A
OTUD4	daunorubicin	Sensitive	ACH-000747	NCIH1703	54726	37	4	146095813	146095813	+	Splice_Site	SNP	C	A
BCOR	daunorubicin	Sensitive	ACH-000282	NCIH1755	54880	37	X	39932311	39932311	+	Missense_Mutation	SNP	C	T
BCOR	daunorubicin	Sensitive	ACH-001137	NCIH1993	54880	37	X	39934067	39934067	+	Missense_Mutation	SNP	G	A
KMT2B	daunorubicin	Sensitive	ACH-000886	NCIH2009	9757	37	19	36227693	36227693	+	Missense_Mutation	SNP	A	C
KMT2B	daunorubicin	Sensitive	ACH-000841	NCIH2087	9757	37	19	36213502	36213502	+	Missense_Mutation	SNP	C	G
BCOR	daunorubicin	Sensitive	ACH-001363	NCIH2135	54880	37	X	39930287	39930287	+	Missense_Mutation	SNP	G	T
KMT2B	daunorubicin	Sensitive	ACH-001363	NCIH2135	9757	37	19	36211143	36211143	+	Silent	SNP	T	G
KMT2B	daunorubicin	Sensitive	ACH-000481	NCIH2170	9757	37	19	36229431	36229431	+	Silent	SNP	C	A
SYT7	daunorubicin	Sensitive	ACH-000447	NCIH2228	9066	37	11	61295642	61295642	+	Missense_Mutation	SNP	C	T
KMT2B	daunorubicin	Sensitive	ACH-000900	NCIH23	9757	37	19	36224030	36224030	+	Missense_Mutation	SNP	G	T
SYT7	daunorubicin	Sensitive	ACH-000951	NCIH2342	9066	37	11	61291865	61291865	+	Frame_Shift_Del	DEL	C	-
OTUD4	daunorubicin	Sensitive	ACH-000251	NCIH2887	54726	37	4	146058661	146058661	+	Missense_Mutation	SNP	C	T
SYT7	daunorubicin	Sensitive	ACH-000109	NCIH3255	9066	37	11	61290642	61290642	+	Missense_Mutation	SNP	C	T
KMT2B	daunorubicin	Sensitive	ACH-000638	NCIH441	9757	37	19	36229026	36229026	+	Silent	SNP	C	T
BCOR	daunorubicin	Sensitive	ACH-000343	NCIH522	54880	37	X	39932333	39932333	+	Nonsense_Mutation	SNP	C	A
KMT2B	daunorubicin	Sensitive	ACH-000416	NCIH838	9757	37	19	36224174	36224174	+	Missense_Mutation	SNP	G	A
BCOR	daunorubicin	Sensitive	ACH-000309	SKLU1	54880	37	X	39930363	39930363	+	Missense_Mutation	SNP	C	A
SHC1	midostaurin	Sensitive	ACH-000528	ABC1	6464	37	1	154942966	154942966	+	Missense_Mutation	SNP	G	A
JAK1	midostaurin	Sensitive	ACH-000264	CALU6	3716	37	1	65316595	65316595	+	Splice_Site	SNP	T	A
ASH1L	midostaurin	Sensitive	ACH-000867	CHAGOK1	55870	37	1	155408358	155408358	+	Nonsense_Mutation	SNP	G	C
SHC1	midostaurin	Sensitive	ACH-000925	DV90	6464	37	1	154938502	154938502	+	Missense_Mutation	SNP	T	A
ASH1L	midostaurin	Sensitive	ACH-000563	EBC1	55870	37	1	155324419	155324419	+	Missense_Mutation	SNP	T	C
NRCAM	midostaurin	Sensitive	ACH-000843	HARA	4897	37	7	107790466	107790466	+	Missense_Mutation	SNP	C	G
ZHX3	midostaurin	Sensitive	ACH-000975	HCC2450	23051	37	20	39832329	39832329	+	Missense_Mutation	SNP	G	T
ASH1L	midostaurin	Sensitive	ACH-000690	HCC2814	55870	37	1	155385552	155385552	+	Silent	SNP	G	A
PCGF1	midostaurin	Sensitive	ACH-000066	HCC4006	84759	37	2	74733110	74733110	+	Missense_Mutation	SNP	C	T
CENPB	midostaurin	Sensitive	ACH-000029	HCC827GR5	1059	37	20	3766350	3766350	+	Missense_Mutation	SNP	A	G
CENPB	midostaurin	Sensitive	ACH-000861	HOP62	1059	37	20	3766380	3766380	+	Missense_Mutation	SNP	G	A
FMO5	midostaurin	Sensitive	ACH-000861	HOP62	2330	37	1	146684961	146684961	+	Missense_Mutation	SNP	C	T
NRCAM	midostaurin	Sensitive	ACH-000861	HOP62	4897	37	7	107824934	107824934	+	Silent	SNP	G	C
FMO5	midostaurin	Sensitive	ACH-000825	HOP92	2330	37	1	146683996	146683996	+	Missense_Mutation	SNP	C	G
FMO5	midostaurin	Sensitive	ACH-000825	HOP92	2330	37	1	146683995	146683995	+	Missense_Mutation	SNP	T	C
NRCAM	midostaurin	Sensitive	ACH-000825	HOP92	4897	37	7	107878205	107878205	+	Missense_Mutation	SNP	G	A
ASH1L	midostaurin	Sensitive	ACH-000672	IALM	55870	37	1	155450831	155450831	+	Silent	SNP	G	A
BSCL2	midostaurin	Sensitive	ACH-000672	IALM	26580	37	11	62458604	62458604	+	Nonsense_Mutation	SNP	G	A
CENPB	midostaurin	Sensitive	ACH-000858	KNS62	1059	37	20	3767105	3767105	+	Missense_Mutation	SNP	G	A
FMO5	midostaurin	Sensitive	ACH-000858	KNS62	2330	37	1	146684034	146684034	+	Missense_Mutation	SNP	T	C
WDR53	midostaurin	Sensitive	ACH-000627	LCLC103H	348793	37	3	196281538	196281538	+	Silent	SNP	C	A
ASH1L	midostaurin	Sensitive	ACH-000769	LK2	55870	37	1	155447823	155447823	+	Missense_Mutation	SNP	C	T
ASH1L	midostaurin	Sensitive	ACH-000438	LU65	55870	37	1	155408443	155408444	+	Frame_Shift_Ins	INS	-	T
ASH1L	midostaurin	Sensitive	ACH-000390	LUDLU1	55870	37	1	155448847	155448847	+	Missense_Mutation	SNP	G	A
NRCAM	midostaurin	Sensitive	ACH-000787	LXF289	4897	37	7	107871529	107871529	+	Missense_Mutation	SNP	G	A
ASH1L	midostaurin	Sensitive	ACH-000980	NCIH1155	55870	37	1	155451997	155451997	+	Nonsense_Mutation	SNP	G	A
BSCL2	midostaurin	Sensitive	ACH-000980	NCIH1155	26580	37	11	62473454	62473454	+	De_novo_Start_OutOfFrame	SNP	C	T
OPA3	midostaurin	Sensitive	ACH-000980	NCIH1155	80207	37	19	46056966	46056966	+	Missense_Mutation	SNP	G	A
SHC1	midostaurin	Sensitive	ACH-000980	NCIH1155	6464	37	1	154938970	154938970	+	Missense_Mutation	SNP	G	A
ASH1L	midostaurin	Sensitive	ACH-000510	NCIH1299	55870	37	1	155408443	155408444	+	Frame_Shift_Ins	INS	-	T
NRCAM	midostaurin	Sensitive	ACH-000510	NCIH1299	4897	37	7	107822315	107822315	+	Missense_Mutation	SNP	C	G
NRCAM	midostaurin	Sensitive	ACH-000510	NCIH1299	4897	37	7	107880464	107880464	+	Silent	SNP	G	A
APLF	midostaurin	Sensitive	ACH-000845	NCIH1373	200558	37	2	68804966	68804966	+	Missense_Mutation	SNP	G	T
ASH1L	midostaurin	Sensitive	ACH-000737	NCIH1385	55870	37	1	155408443	155408444	+	Frame_Shift_Ins	INS	-	T
JAK1	midostaurin	Sensitive	ACH-000737	NCIH1385	3716	37	1	65304265	65304265	+	Silent	SNP	A	G
JAK1	midostaurin	Sensitive	ACH-000892	NCIH1563	3716	37	1	65339055	65339055	+	Nonsense_Mutation	SNP	G	A
OPA3	midostaurin	Sensitive	ACH-000892	NCIH1563	80207	37	19	46056789	46056789	+	Missense_Mutation	SNP	G	A
ZHX3	midostaurin	Sensitive	ACH-000892	NCIH1563	23051	37	20	39831544	39831544	+	Missense_Mutation	SNP	C	G
NRCAM	midostaurin	Sensitive	ACH-000869	NCIH1568	4897	37	7	107790424	107790424	+	Missense_Mutation	SNP	T	A
APLF	midostaurin	Sensitive	ACH-000916	NCIH1573	200558	37	2	68765190	68765190	+	Missense_Mutation	SNP	G	T
WDR53	midostaurin	Sensitive	ACH-000921	NCIH157DM	348793	37	3	196288176	196288176	+	Silent	SNP	G	A
WDR53	midostaurin	Sensitive	ACH-000921	NCIH157DM	348793	37	3	196288121	196288121	+	Missense_Mutation	SNP	T	G
ASH1L	midostaurin	Sensitive	ACH-000015	NCIH1581	55870	37	1	155348170	155348170	+	Silent	SNP	A	G
APLF	midostaurin	Sensitive	ACH-000744	NCIH1623	200558	37	2	68740354	68740354	+	Missense_Mutation	SNP	A	T
ASH1L	midostaurin	Sensitive	ACH-000035	NCIH1650	55870	37	1	155450429	155450429	+	Silent	SNP	G	A
ASH1L	midostaurin	Sensitive	ACH-000893	NCIH1651	55870	37	1	155319353	155319353	+	Silent	SNP	C	T
SHC1	midostaurin	Sensitive	ACH-000747	NCIH1703	6464	37	1	154942696	154942696	+	Missense_Mutation	SNP	C	G
NRCAM	midostaurin	Sensitive	ACH-000675	NCIH1734	4897	37	7	107800878	107800878	+	Missense_Mutation	SNP	C	A
SHC1	midostaurin	Sensitive	ACH-001362	NCIH1770	6464	37	1	154942661	154942661	+	Silent	SNP	C	T
ZHX3	midostaurin	Sensitive	ACH-001362	NCIH1770	23051	37	20	39830766	39830766	+	Missense_Mutation	SNP	C	T
ASH1L	midostaurin	Sensitive	ACH-000888	NCIH1793	55870	37	1	155449346	155449346	+	Silent	SNP	T	A
JAK1	midostaurin	Sensitive	ACH-000888	NCIH1793	3716	37	1	65321267	65321267	+	Missense_Mutation	SNP	G	A
NRCAM	midostaurin	Sensitive	ACH-000888	NCIH1793	4897	37	7	107832179	107832179	+	Missense_Mutation	SNP	C	G
CENPB	midostaurin	Sensitive	ACH-000733	NCIH1838	1059	37	20	3765421	3765421	+	Silent	SNP	G	A
CENPB	midostaurin	Sensitive	ACH-000733	NCIH1838	1059	37	20	3766165	3766165	+	Silent	SNP	C	A
NRCAM	midostaurin	Sensitive	ACH-000434	NCIH1915	4897	37	7	107866779	107866779	+	Frame_Shift_Del	DEL	C	-
NRCAM	midostaurin	Sensitive	ACH-000414	NCIH1944	4897	37	7	107830131	107830131	+	Silent	SNP	G	A
ASH1L	midostaurin	Sensitive	ACH-001137	NCIH1993	55870	37	1	155317500	155317500	+	Missense_Mutation	SNP	T	C
ASH1L	midostaurin	Sensitive	ACH-001137	NCIH1993	55870	37	1	155313264	155313264	+	Missense_Mutation	SNP	C	A
PCGF1	midostaurin	Sensitive	ACH-001137	NCIH1993	84759	37	2	74732874	74732874	+	Missense_Mutation	SNP	C	T
WDR53	midostaurin	Sensitive	ACH-001137	NCIH1993	348793	37	3	196281593	196281593	+	Missense_Mutation	SNP	T	G
ASH1L	midostaurin	Sensitive	ACH-000886	NCIH2009	55870	37	1	155452137	155452137	+	Missense_Mutation	SNP	G	A
ZHX3	midostaurin	Sensitive	ACH-000886	NCIH2009	23051	37	20	39831085	39831085	+	Silent	SNP	G	C
ASH1L	midostaurin	Sensitive	ACH-000781	NCIH2023	55870	37	1	155309119	155309119	+	Splice_Site	SNP	C	A
ZHX3	midostaurin	Sensitive	ACH-000781	NCIH2023	23051	37	20	39831574	39831574	+	Silent	SNP	T	C
ASH1L	midostaurin	Sensitive	ACH-000590	NCIH2073	55870	37	1	155317500	155317500	+	Missense_Mutation	SNP	T	C
ASH1L	midostaurin	Sensitive	ACH-000590	NCIH2073	55870	37	1	155313264	155313264	+	Missense_Mutation	SNP	C	A
PCGF1	midostaurin	Sensitive	ACH-000590	NCIH2073	84759	37	2	74732874	74732874	+	Missense_Mutation	SNP	C	T
WDR53	midostaurin	Sensitive	ACH-000841	NCIH2087	348793	37	3	196281552	196281552	+	Missense_Mutation	SNP	T	C
SHC1	midostaurin	Sensitive	ACH-000904	NCIH2106	6464	37	1	154942661	154942661	+	Silent	SNP	C	T
ZHX3	midostaurin	Sensitive	ACH-000904	NCIH2106	23051	37	20	39830766	39830766	+	Missense_Mutation	SNP	C	T
NRCAM	midostaurin	Sensitive	ACH-000929	NCIH2110	4897	37	7	107849901	107849901	+	Nonsense_Mutation	SNP	C	A
ASH1L	midostaurin	Sensitive	ACH-000311	NCIH2122	55870	37	1	155448490	155448490	+	Missense_Mutation	SNP	G	A
FMO5	midostaurin	Sensitive	ACH-001363	NCIH2135	2330	37	1	146684060	146684060	+	Nonsense_Mutation	SNP	A	C
NRCAM	midostaurin	Sensitive	ACH-000924	NCIH2172	4897	37	7	107838511	107838511	+	Missense_Mutation	SNP	C	A
NRCAM	midostaurin	Sensitive	ACH-000924	NCIH2172	4897	37	7	107824935	107824935	+	Missense_Mutation	SNP	C	T
NRCAM	midostaurin	Sensitive	ACH-000924	NCIH2172	4897	37	7	107824699	107824699	+	Missense_Mutation	SNP	C	A
NRCAM	midostaurin	Sensitive	ACH-000718	NCIH2291	4897	37	7	107880462	107880462	+	Missense_Mutation	SNP	C	T
ASH1L	midostaurin	Sensitive	ACH-000900	NCIH23	55870	37	1	155450158	155450158	+	Nonsense_Mutation	SNP	C	A
JAK1	midostaurin	Sensitive	ACH-000700	NCIH2882	3716	37	1	65301842	65301842	+	Missense_Mutation	SNP	G	C
ASH1L	midostaurin	Sensitive	ACH-000251	NCIH2887	55870	37	1	155429608	155429608	+	Missense_Mutation	SNP	G	T
ASH1L	midostaurin	Sensitive	ACH-000860	NCIH358	55870	37	1	155451578	155451578	+	Silent	SNP	A	T
NRCAM	midostaurin	Sensitive	ACH-000860	NCIH358	4897	37	7	107849897	107849897	+	Missense_Mutation	SNP	G	T
BSCL2	midostaurin	Sensitive	ACH-000945	NCIH650	26580	37	11	62472811	62472811	+	Silent	SNP	C	A
NRCAM	midostaurin	Sensitive	ACH-000945	NCIH650	4897	37	7	107830185	107830185	+	Missense_Mutation	SNP	G	C
ASH1L	midostaurin	Sensitive	ACH-000853	NCIH661	55870	37	1	155429599	155429599	+	Missense_Mutation	SNP	G	C
ASH1L	midostaurin	Sensitive	ACH-000789	NCIH810	55870	37	1	155349858	155349858	+	Silent	SNP	G	A
APLF	midostaurin	Sensitive	ACH-000416	NCIH838	200558	37	2	68753325	68753325	+	Missense_Mutation	SNP	G	T
ASH1L	midostaurin	Sensitive	ACH-000416	NCIH838	55870	37	1	155448847	155448847	+	Missense_Mutation	SNP	G	A
ACBD5	midostaurin	Sensitive	ACH-000030	PC14	91452	37	10	27529365	27529365	+	Missense_Mutation	SNP	C	G
OPA3	midostaurin	Sensitive	ACH-000030	PC14	80207	37	19	46032616	46032616	+	Missense_Mutation	SNP	C	T
ACBD5	midostaurin	Sensitive	ACH-000779	PC9	91452	37	10	27529365	27529365	+	Missense_Mutation	SNP	C	G
OPA3	midostaurin	Sensitive	ACH-000779	PC9	80207	37	19	46032616	46032616	+	Missense_Mutation	SNP	C	T
ASH1L	midostaurin	Sensitive	ACH-000791	RERFLCAD1	55870	37	1	155448422	155448422	+	Silent	SNP	T	C
ZHX3	midostaurin	Sensitive	ACH-000791	RERFLCAD1	23051	37	20	39830814	39830814	+	Missense_Mutation	SNP	C	T
FMO5	midostaurin	Sensitive	ACH-000553	SQ1	2330	37	1	146661771	146661771	+	Missense_Mutation	SNP	T	C
FMO5	midostaurin	Sensitive	ACH-000553	SQ1	2330	37	1	146661772	146661772	+	Missense_Mutation	SNP	C	T
ASH1L	midostaurin	Sensitive	ACH-000813	T3M10	55870	37	1	155327426	155327427	+	Frame_Shift_Ins	INS	-	T
ASH1L	midostaurin	Sensitive	ACH-000813	T3M10	55870	37	1	155340761	155340761	+	Nonsense_Mutation	SNP	C	A
JAK1	midostaurin	Sensitive	ACH-000813	T3M10	3716	37	1	65330629	65330630	+	Frame_Shift_Ins	INS	-	T
JAK1	midostaurin	Sensitive	ACH-001233	VMRCLCD	3716	37	1	65332872	65332872	+	Nonsense_Mutation	SNP	C	A

## Sheet: fusion
Gene	drugName	geneCategory	DepMap_ID	cell_line_name	stripped_cell_line_name	FusionName	JunctionReadCount	SpanningFragCount	SpliceType	LeftGene	LeftBreakpoint	RightGene	RightBreakpoint	LargeAnchorSupport	FFPM	LeftBreakDinuc	LeftBreakEntropy	RightBreakDinuc	RightBreakEntropy	annots	CCLE_count
CD44	BX-912	Sensitive	ACH-000843	HARA	HARA	CD44--PDHX	2	3	ONLY_REF_SPLICE	CD44 (ENSG00000026508.18)	chr11:35190065:+	PDHX (ENSG00000110435.11)	chr11:34931404:+	YES_LDAS	0.073	GT	1.8892	AG	1.9656	[\CCLE_StarF2019\,\TCGA_StarF2019\,\Klijn_CellLines\,\ChimerSeq\,\INTRACHROMOSOMAL[chr11:0.12Mb]\]	53
CD44	BX-912	Sensitive	ACH-000843	HARA	HARA	PDHX--CD44	1	3	ONLY_REF_SPLICE	PDHX (ENSG00000110435.11)	chr11:34931484:+	CD44 (ENSG00000026508.18)	chr11:35214852:+	YES_LDAS	0.0584	GT	1.5628	AG	1.7465	[\INTRACHROMOSOMAL[chr11:0.12Mb]\]	9
CD44	BX-912	Sensitive	ACH-000066	HCC4006	HCC4006	CD44--PDHX	1	4	ONLY_REF_SPLICE	CD44 (ENSG00000026508.18)	chr11:35201195:+	PDHX (ENSG00000110435.11)	chr11:34931404:+	YES_LDAS	0.0556	GT	1.9329	AG	1.9656	[\CCLE_StarF2019\,\TCGA_StarF2019\,\Klijn_CellLines\,\ChimerSeq\,\INTRACHROMOSOMAL[chr11:0.12Mb]\]	1
CD44	BX-912	Sensitive	ACH-000066	HCC4006	HCC4006	CD44--PDHX	3	4	ONLY_REF_SPLICE	CD44 (ENSG00000026508.18)	chr11:35190065:+	PDHX (ENSG00000110435.11)	chr11:34931404:+	YES_LDAS	0.0779	GT	1.8892	AG	1.9656	[\CCLE_StarF2019\,\TCGA_StarF2019\,\Klijn_CellLines\,\ChimerSeq\,\INTRACHROMOSOMAL[chr11:0.12Mb]\]	53
CD44	BX-912	Sensitive	ACH-000066	HCC4006	HCC4006	CD44--CAT	1369	775	ONLY_REF_SPLICE	CD44 (ENSG00000026508.18)	chr11:35139370:+	CAT (ENSG00000121691.5)	chr11:34468288:+	YES_LDAS	23.86	GT	1.8323	AG	1.9086	[\CCLE_StarF2019\,\INTRACHROMOSOMAL[chr11:0.67Mb]\]	2
CD44	BX-912	Sensitive	ACH-000066	HCC4006	HCC4006	CD44--PDHX	2	4	ONLY_REF_SPLICE	CD44 (ENSG00000026508.18)	chr11:35139370:+	PDHX (ENSG00000110435.11)	chr11:34931404:+	YES_LDAS	0.0668	GT	1.8323	AG	1.9656	[\CCLE_StarF2019\,\TCGA_StarF2019\,\Klijn_CellLines\,\ChimerSeq\,\INTRACHROMOSOMAL[chr11:0.12Mb]\]	34
CD44	BX-912	Sensitive	ACH-000066	HCC4006	HCC4006	CD44--PDHX	1	4	ONLY_REF_SPLICE	CD44 (ENSG00000026508.18)	chr11:35139370:+	PDHX (ENSG00000110435.11)	chr11:34947506:+	YES_LDAS	0.0556	GT	1.8323	AG	1.6729	[\CCLE_StarF2019\,\TCGA_StarF2019\,\Klijn_CellLines\,\ChimerSeq\,\INTRACHROMOSOMAL[chr11:0.12Mb]\]	11
CD44	BX-912	Sensitive	ACH-000454	HCC-95	HCC95	CD44--CR382287.1	154	127	INCL_NON_REF_SPLICE	CD44 (ENSG00000026508.18)	chr11:35139370:+	CR382287.1 (ENSG00000279062.1)	chr21:10136426:+	YES_LDAS	3.0597	GT	1.8323	AG	1.8256	[\CCLE_StarF2019\,\INTERCHROMOSOMAL[chr11--chr21]\]	1
CD44	BX-912	Sensitive	ACH-000454	HCC-95	HCC95	CD44--PDHX	4	1	ONLY_REF_SPLICE	CD44 (ENSG00000026508.18)	chr11:35190065:+	PDHX (ENSG00000110435.11)	chr11:34931404:+	YES_LDAS	0.0545	GT	1.8892	AG	1.9656	[\CCLE_StarF2019\,\TCGA_StarF2019\,\Klijn_CellLines\,\ChimerSeq\,\INTRACHROMOSOMAL[chr11:0.12Mb]\]	53
CD44	BX-912	Sensitive	ACH-000454	HCC-95	HCC95	LDLRAD3--CD44	1	9	ONLY_REF_SPLICE	LDLRAD3 (ENSG00000179241.12)	chr11:35944144:+	CD44 (ENSG00000026508.18)	chr11:35176575:+	YES_LDAS	0.1089	GT	1.6895	AG	1.7056	[\Klijn_CellLines\,\ChimerSeq\,\TumorFusionsNAR2018\,\CCLE_StarF2019\,\INTRACHROMOSOMAL[chr11:0.71Mb]\]	3
CD44	BX-912	Sensitive	ACH-000454	HCC-95	HCC95	LDLRAD3--CD44	1	9	ONLY_REF_SPLICE	LDLRAD3 (ENSG00000179241.12)	chr11:36098461:+	CD44 (ENSG00000026508.18)	chr11:35176575:+	YES_LDAS	0.1089	GT	1.9329	AG	1.7056	[\Klijn_CellLines\,\ChimerSeq\,\TumorFusionsNAR2018\,\CCLE_StarF2019\,\INTRACHROMOSOMAL[chr11:0.71Mb]\]	1
CD44	BX-912	Sensitive	ACH-000454	HCC-95	HCC95	LDLRAD3--CD44	6	9	ONLY_REF_SPLICE	LDLRAD3 (ENSG00000179241.12)	chr11:36098461:+	CD44 (ENSG00000026508.18)	chr11:35180274:+	YES_LDAS	0.1633	GT	1.9329	AG	1.8256	[\Klijn_CellLines\,\ChimerSeq\,\TumorFusionsNAR2018\,\CCLE_StarF2019\,\INTRACHROMOSOMAL[chr11:0.71Mb]\]	1
CD44	BX-912	Sensitive	ACH-000454	HCC-95	HCC95	LDLRAD3--CD44	2	9	ONLY_REF_SPLICE	LDLRAD3 (ENSG00000179241.12)	chr11:35944144:+	CD44 (ENSG00000026508.18)	chr11:35214852:+	YES_LDAS	0.1198	GT	1.6895	AG	1.7465	[\Klijn_CellLines\,\ChimerSeq\,\TumorFusionsNAR2018\,\CCLE_StarF2019\,\INTRACHROMOSOMAL[chr11:0.71Mb]\]	3
CD44	BX-912	Sensitive	ACH-000454	HCC-95	HCC95	LDLRAD3--CD44	1	9	ONLY_REF_SPLICE	LDLRAD3 (ENSG00000179241.12)	chr11:36098461:+	CD44 (ENSG00000026508.18)	chr11:35186832:+	YES_LDAS	0.1089	GT	1.9329	AG	1.9086	[\Klijn_CellLines\,\ChimerSeq\,\TumorFusionsNAR2018\,\CCLE_StarF2019\,\INTRACHROMOSOMAL[chr11:0.71Mb]\]	1
CD44	BX-912	Sensitive	ACH-000454	HCC-95	HCC95	LDLRAD3--CD44	1	9	ONLY_REF_SPLICE	LDLRAD3 (ENSG00000179241.12)	chr11:36098461:+	CD44 (ENSG00000026508.18)	chr11:35208105:+	YES_LDAS	0.1089	GT	1.9329	AG	1.9899	[\Klijn_CellLines\,\ChimerSeq\,\TumorFusionsNAR2018\,\CCLE_StarF2019\,\INTRACHROMOSOMAL[chr11:0.71Mb]\]	1
BCAS1	BX-912	Resistant	ACH-000596	LCLC-97TM1	LCLC97TM1	TOP1--BCAS1	1	4	ONLY_REF_SPLICE	TOP1 (ENSG00000198900.5)	chr20:41029455:+	BCAS1 (ENSG00000064787.13)	chr20:54058723:-	YES_LDAS	0.071	GT	1.8892	AG	1.9086	[\INTRACHROMOSOMAL[chr20:12.81Mb]\]	1
CDK6	BX-912	Sensitive	ACH-000845	NCI-H1373	NCIH1373	FAM133B--CDK6	63	51	ONLY_REF_SPLICE	FAM133B (ENSG00000234545.7)	chr7:92581506:-	CDK6 (ENSG00000105810.9)	chr7:92623086:-	YES_LDAS	1.366	GT	1.8892	AG	1.5301	[\CCLE_StarF2019\,\TCGA_StarF2019\,\ChimerPub\,\TumorFusionsNAR2018\,\Klijn_CellLines\,\ChimerSeq\,\INTRACHROMOSOMAL[chr7:0.01Mb]\,\LOCAL_REARRANGEMENT:-:[14527]\]	2
NPC2	BX-912	Sensitive	ACH-000282	NCI-H1755	NCIH1755	NPC2--AL133166.1	4	3	INCL_NON_REF_SPLICE	NPC2 (ENSG00000119655.10)	chr14:74493193:-	AL133166.1 (ENSG00000257522.5)	chr14:29381264:-	YES_LDAS	0.0682	GT	1.9656	AG	1.9656	[\INTRACHROMOSOMAL[chr14:45.09Mb]\]	1
NEGR1	BX-912	Sensitive	ACH-000434	NCI-H1915	NCIH1915	NEGR1--TCF20	34	21	ONLY_REF_SPLICE	NEGR1 (ENSG00000172260.14)	chr1:71935079:-	TCF20 (ENSG00000100207.18)	chr22:42179702:-	YES_LDAS	0.5346	GT	1.9656	AG	1.9329	[\CCLE_StarF2019\,\INTERCHROMOSOMAL[chr1--chr22]\]	1
CD44	BX-912	Sensitive	ACH-000904	NCI-H2106	NCIH2106	CD44--PAMR1	2	4	ONLY_REF_SPLICE	CD44 (ENSG00000026508.18)	chr11:35180407:+	PAMR1 (ENSG00000149090.11)	chr11:35474744:-	YES_LDAS	0.0633	GT	1.9656	AG	1.8892	[\CCLE_StarF2019\,\INTRACHROMOSOMAL[chr11:0.20Mb]\]	1
CD44	BX-912	Sensitive	ACH-000904	NCI-H2106	NCIH2106	CD44--PAMR1	1	4	ONLY_REF_SPLICE	CD44 (ENSG00000026508.18)	chr11:35139370:+	PAMR1 (ENSG00000149090.11)	chr11:35494272:-	YES_LDAS	0.0527	GT	1.8323	AG	1.8892	[\CCLE_StarF2019\,\INTRACHROMOSOMAL[chr11:0.20Mb]\]	2
CD44	BX-912	Sensitive	ACH-000904	NCI-H2106	NCIH2106	CD44--PAMR1	1	4	ONLY_REF_SPLICE	CD44 (ENSG00000026508.18)	chr11:35139370:+	PAMR1 (ENSG00000149090.11)	chr11:35441693:-	YES_LDAS	0.0527	GT	1.8323	AG	1.8295	[\CCLE_StarF2019\,\INTRACHROMOSOMAL[chr11:0.20Mb]\]	1
CD44	BX-912	Sensitive	ACH-000904	NCI-H2106	NCIH2106	CD44--PAMR1	1	4	ONLY_REF_SPLICE	CD44 (ENSG00000026508.18)	chr11:35139370:+	PAMR1 (ENSG00000149090.11)	chr11:35474744:-	YES_LDAS	0.0527	GT	1.8323	AG	1.8892	[\CCLE_StarF2019\,\INTRACHROMOSOMAL[chr11:0.20Mb]\]	1
LGMN	BX-912	Sensitive	ACH-000447	NCI-H2228	NCIH2228	FP236383.2--LGMN	3	10	INCL_NON_REF_SPLICE	FP236383.2 (ENSG00000280614.1)	chr21:8394000:-	LGMN (ENSG00000100600.14)	chr14:92711677:-	NO_LDAS	0.1228	CA	1.7819	GT	1.8892	[\CCLE_StarF2019\,\INTERCHROMOSOMAL[chr21--chr14]\]	3
NCOR2	BX-912	Sensitive	ACH-000121	NCI-H2405	NCIH2405	NCOR2--SCARB1	31	24	ONLY_REF_SPLICE	NCOR2 (ENSG00000196498.13)	chr12:124518140:-	SCARB1 (ENSG00000073060.15)	chr12:124787457:-	YES_LDAS	0.5706	GT	1.7819	AG	1.7968	[\ChimerSeq\,\YOSHIHARA_TCGA\,\TCGA_StarF2019\,\TumorFusionsNAR2018\,\CCLE_StarF2019\,\INTRACHROMOSOMAL[chr12:0.21Mb]\]	1
NCOR2	BX-912	Sensitive	ACH-000121	NCI-H2405	NCIH2405	NCOR2--SCARB1	48	24	ONLY_REF_SPLICE	NCOR2 (ENSG00000196498.13)	chr12:124535565:-	SCARB1 (ENSG00000073060.15)	chr12:124787457:-	YES_LDAS	0.747	GT	1.8323	AG	1.7968	[\ChimerSeq\,\YOSHIHARA_TCGA\,\TCGA_StarF2019\,\TumorFusionsNAR2018\,\CCLE_StarF2019\,\INTRACHROMOSOMAL[chr12:0.21Mb]\]	1
NCOR2	BX-912	Sensitive	ACH-000121	NCI-H2405	NCIH2405	NCOR2--SCARB1	8	24	ONLY_REF_SPLICE	NCOR2 (ENSG00000196498.13)	chr12:124567308:-	SCARB1 (ENSG00000073060.15)	chr12:124787457:-	YES_LDAS	0.332	GT	1.7968	AG	1.7968	[\ChimerSeq\,\YOSHIHARA_TCGA\,\TCGA_StarF2019\,\TumorFusionsNAR2018\,\CCLE_StarF2019\,\INTRACHROMOSOMAL[chr12:0.21Mb]\]	1
RRBP1	BX-912	Sensitive	ACH-000109	NCI-H3255	NCIH3255	SIPA1L3--RRBP1	11	1	ONLY_REF_SPLICE	SIPA1L3 (ENSG00000105738.10)	chr19:38029156:+	RRBP1 (ENSG00000125844.15)	chr20:17660528:-	YES_LDAS	0.0969	GT	1.8323	AG	1.5329	[\INTERCHROMOSOMAL[chr19--chr20]\]	1
RRBP1	BX-912	Sensitive	ACH-000109	NCI-H3255	NCIH3255	SIPA1L3--RRBP1	6	1	ONLY_REF_SPLICE	SIPA1L3 (ENSG00000105738.10)	chr19:38029156:+	RRBP1 (ENSG00000125844.15)	chr20:17680075:-	YES_LDAS	0.0565	GT	1.8323	AG	1.9656	[\INTERCHROMOSOMAL[chr19--chr20]\]	1
BCAS1	BX-912	Resistant	ACH-000343	NCI-H522	NCIH522	ZNF217--BCAS1	5	9	ONLY_REF_SPLICE	ZNF217 (ENSG00000171940.13)	chr20:53593756:-	BCAS1 (ENSG00000064787.13)	chr20:53957497:-	YES_LDAS	0.1576	GT	1.5058	AG	1.7819	[\CCLE_StarF2019\,\TumorFusionsNAR2018\,\TCGA_StarF2019\,\INTRACHROMOSOMAL[chr20:0.33Mb]\]	1
BCAS1	BX-912	Resistant	ACH-000343	NCI-H522	NCIH522	ZNF217--BCAS1	4	9	ONLY_REF_SPLICE	ZNF217 (ENSG00000171940.13)	chr20:53597631:-	BCAS1 (ENSG00000064787.13)	chr20:53957497:-	YES_LDAS	0.1463	GT	1.8892	AG	1.7819	[\CCLE_StarF2019\,\TumorFusionsNAR2018\,\TCGA_StarF2019\,\INTRACHROMOSOMAL[chr20:0.33Mb]\]	2
BCAS1	BX-912	Resistant	ACH-000343	NCI-H522	NCIH522	ZNF217--BCAS1	22	9	ONLY_REF_SPLICE	ZNF217 (ENSG00000171940.13)	chr20:53597631:-	BCAS1 (ENSG00000064787.13)	chr20:53953695:-	YES_LDAS	0.3489	GT	1.8892	AG	1.7056	[\CCLE_StarF2019\,\TumorFusionsNAR2018\,\TCGA_StarF2019\,\INTRACHROMOSOMAL[chr20:0.33Mb]\]	3
BCAS1	BX-912	Resistant	ACH-000343	NCI-H522	NCIH522	ZNF217--BCAS1	7	9	ONLY_REF_SPLICE	ZNF217 (ENSG00000171940.13)	chr20:53593756:-	BCAS1 (ENSG00000064787.13)	chr20:53953695:-	YES_LDAS	0.1801	GT	1.5058	AG	1.7056	[\CCLE_StarF2019\,\TumorFusionsNAR2018\,\TCGA_StarF2019\,\INTRACHROMOSOMAL[chr20:0.33Mb]\]	2
STAU1	BX-912	Sensitive	ACH-000628	NCI-H596	NCIH596	STAU1--TYW1	84	26	ONLY_REF_SPLICE	STAU1 (ENSG00000124214.19)	chr20:49188116:-	TYW1 (ENSG00000198874.12)	chr7:67183126:+	YES_LDAS	1.0328	GT	1.5656	AG	1.8323	[\CCLE_StarF2019\,\INTERCHROMOSOMAL[chr20--chr7]\]	1
STAU1	BX-912	Sensitive	ACH-000628	NCI-H596	NCIH596	MMP24OS--STAU1	9	2	ONLY_REF_SPLICE	MMP24OS (ENSG00000126005.16)	chr20:35272005:-	STAU1 (ENSG00000124214.19)	chr20:49174269:-	YES_LDAS	0.1033	GT	1.8892	AG	1.7819	[\INTRACHROMOSOMAL[chr20:13.84Mb]\]	2
STAU1	BX-912	Sensitive	ACH-000628	NCI-H596	NCIH596	AL121753.1--STAU1	9	2	ONLY_REF_SPLICE	AL121753.1 (ENSG00000261582.1)	chr20:35272005:-	STAU1 (ENSG00000124214.19)	chr20:49174269:-	YES_LDAS	0.1033	GT	1.8892	AG	1.7819	[\CCLE_StarF2019\,\INTRACHROMOSOMAL[chr20:13.83Mb]\]	2
RRBP1	BX-912	Sensitive	ACH-000813	T3M-10	T3M10	SLC3A2--RRBP1	3	1	INCL_NON_REF_SPLICE	SLC3A2 (ENSG00000168003.16)	chr11:62880994:+	RRBP1 (ENSG00000125844.15)	chr20:17636674:-	YES_LDAS	0.0591	TG	1.8892	GC	1.6402	[\INTERCHROMOSOMAL[chr11--chr20]\]	1
NRCAM	midostaurin	Sensitive	ACH-000705	LC-1F	LC1F	GPR155--NRCAM	3	5	INCL_NON_REF_SPLICE	GPR155 (ENSG00000163328.13)	chr2:174432004:-	NRCAM (ENSG00000091129.19)	chr7:108149297:-	YES_LDAS	0.1077	CT	1.8256	AC	1.7465	[\CCLE_StarF2019\,\INTERCHROMOSOMAL[chr2--chr7]\]	1
ACBD5	midostaurin	Sensitive	ACH-000924	NCI-H2172	NCIH2172	ACBD5--AC018980.1	35	6	ONLY_REF_SPLICE	ACBD5 (ENSG00000107897.18)	chr10:27219723:-	AC018980.1 (ENSG00000226412.1)	chr10:33579369:-	YES_LDAS	0.3704	GT	1.6729	AG	1.6729	[\CCLE_StarF2019\,\INTRACHROMOSOMAL[chr10:6.34Mb]\]	1
ASH1L	midostaurin	Sensitive	ACH-000837	NCI-H322	NCIH322	ASH1L--YY1AP1	15	8	ONLY_REF_SPLICE	ASH1L (ENSG00000116539.12)	chr1:155395459:-	YY1AP1 (ENSG00000163374.19)	chr1:155676746:-	YES_LDAS	0.2418	GT	1.9086	AG	1.9329	[\CCLE_StarF2019\,\TCGA_StarF2019\,\INTRACHROMOSOMAL[chr1:0.10Mb]\,\LOCAL_REARRANGEMENT:-:[96636]\]	1
NRCAM	midostaurin	Sensitive	ACH-000378	NCI-H647	NCIH647	NRCAM--PNPLA8	162	45	ONLY_REF_SPLICE	NRCAM (ENSG00000091129.19)	chr7:108456243:-	PNPLA8 (ENSG00000135241.16)	chr7:108502642:-	YES_LDAS	1.8247	GT	1.5058	AG	1.7968	[\ChimerSeq\,\CCLE_StarF2019\,\INTRACHROMOSOMAL[chr7:0.01Mb]\,\LOCAL_REARRANGEMENT:-:[13705]\]	1
SHC1	midostaurin	Sensitive	ACH-000677	SW 1573	SW1573	SHC1--MRPL34	4	0	INCL_NON_REF_SPLICE	SHC1 (ENSG00000160691.18)	chr1:154967670:-	MRPL34 (ENSG00000130312.6)	chr19:17305893:+	YES_LDAS	0.0695	TG	1.8892	AT	1.7819	[\INTERCHROMOSOMAL[chr1--chr19]\]	1
