# Supplementary figures and images for: MicroRNA, mRNA, and Proteomics Biomarkers and Therapeutic Targets for Improving Lung Cancer Treatment Outcomes
Source: MDPI journal article supplement (doi:10.3390/cancers15082294), 2023-04-14

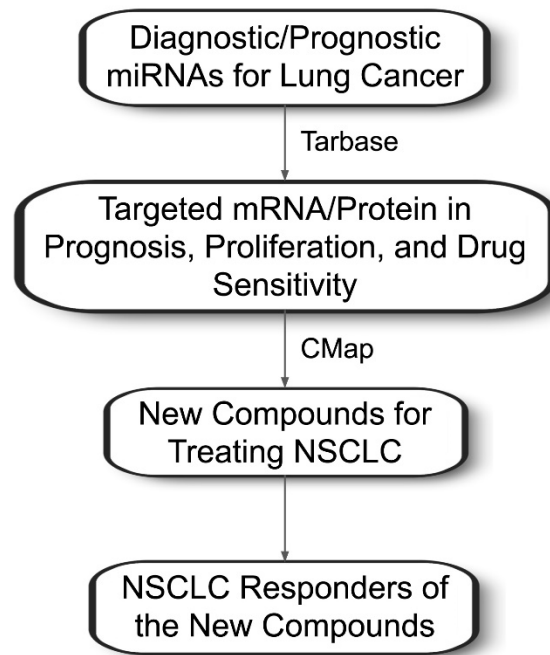

**Figure S1.** Overall study scheme. The arrows indicate analysis flow.

Supplement: s1 [file s1]
